# Supplementary material for: Role of Cysteine Residues in the Structure, Stability, and Alkane Producing Activity of Cyanobacterial Aldehyde Deformylating Oxygenase
Source: PubMed Central journal article supplement (PMC4383598; doi:10.1371/journal.pone.0122217), 2015-04-02
Supplement: pone.0122217.s001.pdf [file pone.0122217.s001.pdf]

1.....10.....20.....  
: . \*::: \*\*:

```
sp|B2J1M1|ALDEC_NOSP7|-----MQQLTDQSKELDFKSEYKDAYSRIN
tr|U5QDK0|U5QDK0_9CYAN|-----MNRTDESTAAGAPALDYRSEYKDAYSRIN
tr|Q7NGM3|Q7NGM3_GLOVI|-----MN-----RTAPSSAALDYRSDTYRDAYSRIN
tr|Q2JJ13|Q2JJ13_SYNJB|---MNVLNPTPQ-----PLADEGGTTLDYGSAYVRQAYSRIN
tr|Q2JX62|Q2JX62_SYNJA|MAPANVLNPTPP-----SPTDGGGTALDYSSPRYRQAYSRIN
tr|K9RTZ6|K9RTZ6_SYNP3|-----MSP-IQAPTLDYTSYKDAYSRIN
tr|Q8DJB4|Q8DJB4_THEEB|-----MTTA-TATPVLDYHSDRYKDAYSRIN
tr|V5V382|V5V382_9CHRO|-----MTTA-TATPDLDYHSDRYKDAYSRIN
tr|B0C9L0|B0C9L0_ACAM1|-----MPQT-QAISEIDFYSDTYKDAYSRID
tr|B8HSZ3|B8HSZ3_CYAP4|-----MPQV-QSPSAIDFYSEYQDAYSRID
tr|L8LLH3|L8LLH3_9CHRO|-----MQEL-TMPRELDYQSPYKDAYSRIN
tr|K9Z5G1|K9Z5G1_CYAAP|-----MQQ--LVEPTIDFNSDVYKDAYSRIN
tr|I4FNH9|I4FNH9_MICAE|-----MPEL-AVPLELDFTSYKDAYSRIN
tr|I4I7T6|I4I7T6_9CHRO|-----MPEL-AVPLELDFTSYKDAYSRIN
tr|I4HKI6|I4HKI6_MICAE|-----MPEL-AVPLELDFTSYKDAYSRIN
tr|B0JY93|B0JY93_MICAN|-----MPEL-AVPLELDFTSYKDAYSRIN
tr|I4GYG9|I4GYG9_MICAE|-----MPEL-AVPLELDFTSYKDAYSRIN
tr|I4IM50|I4IM50_MICAE|-----MPEL-AVSELDFTSYKDAYSRIN
tr|I4FD05|I4FD05_MICAE|-----MPEL-AVPLELDFTSYKDAYSRIN
tr|L7E3D3|L7E3D3_MICAE|-----MPEL-AVPLELDFTSYKDAYSRIN
tr|L8NPI8|L8NPI8_MICAE|-----MPEL-AVPLELDFTSYKDAYSRIN
tr|A8YJD6|A8YJD6_MICAE|-----MPEL-AVPLELDFTSYKDAYSRIN
tr|S3JGS6|S3JGS6_MICAE|-----MPEL-AVPLELDFTSYKDAYSRIN
tr|I4GKL8|I4GKL8_MICAE|-----MPEL-AVPLELDFTSYKDAYSRIN
tr|I4HLI6|I4HLI6_MICAE|-----MPEL-AVPLELDFTSYKDAYSRIN
tr|I4FY74|I4FY74_MICAE|-----MPEL-AVPLELDFTSYKDAYSRIN
tr|I4H417|I4H417_MICAE|-----MPEL-AVPLELDFTSYKDAYSRIN
tr|M1LIQ1|M1LIQ1_9SYNC|-----MPEL-AVRTEFDYSSEIYKDAYSRIN
tr|H0NYN3|H0NYN3_9SYNC|-----MPEL-AVRTEFDYSSEIYKDAYSRIN
tr|H0PB35|H0PB35_9SYNC|-----MPEL-AVRTEFDYSSEIYKDAYSRIN
tr|H0PG18|H0PG18_9SYNC|-----MPEL-AVRTEFDYSSEIYKDAYSRIN
tr|F7US88|F7US88_SYNYG|-----MPEL-AVRTEFDYSSEIYKDAYSRIN
sp|Q55688|ALDEC_SYNY3|-----MPEL-AVRTEFDYSSEIYKDAYSRIN
tr|D3EPA5|D3EPA5_ATETH|-----MQEL-ALRSELDNFSEYKDAYSRIN
tr|B7JUH1|B7JUH1_CYAP8|-----MQEL-VQRSELDFTNPTYKDAYSRIN
tr|C7QUV0|C7QUV0_CYAP0|-----MQEL-VQRSELDFTNPTYKDAYSRIN
tr|G5J0P0|G5J0P0_CROWT|-----MQEL-AVRSELDNFSEYKDAYSRIN
tr|T2JF13|T2JF13_CROWT|-----MQEL-AVRSELDNFSEYKDAYSRIN
tr|Q4C7T3|Q4C7T3_CROWT|-----MQEL-AVRSELDNFSEYKDAYSRIN
tr|T2IH71|T2IH71_CROWT|-----MQEL-AVRSELDNFSEYKDAYSRIN
tr|A3INE1|A3INE1_9CHRO|-----MQEL-ALRSELDNFSEYKDAYSRIN
tr|B1WR71|B1WR71_CYAA5|-----MQEL-ALRSELDNFSEYKDAYSRIN
tr|U5DFA3|U5DFA3_9CHRO|-----MQEL-AASTALDYSDVYKDAYSRIN
tr|L8N0G8|L8N0G8_9CYAN|-----MGQ----TLEAVAIDYQ TENYRDAYSRIN
tr|K9SPY2|K9SPY2_9CYAN|-----MIGQQ----LDIVTELDYNSDYRDAYSRIN
tr|K9SZC3|K9SZC3_9SYNE|-----MIGQIFAADFADENIDIDYRSDTYRDAYSRIN
tr|B4WJ48|B4WJ48_9SYNE|-----MQTL-EVSPAMDFQSEYKDAYSRIN
tr|U9WCI1|U9WCI1_9CYAN|-----MPQL-EASPTLDFQSEAYKDAYSRIN
tr|W5U411|W5U411_9CYAN|-----MPQL-EASLALDFQSEAYKDAYSRIN
tr|K9F0G4|K9F0G4_9CYAN|-----MPQL-EASPALDFQSEAYKDAYSRIN
tr|K9ULL9|K9ULL9_9CHRO|-----MVQM-AASLELNFTSEIYKDAYSRID
tr|K8GFP8|K8GFP8_9CYAN|-----MPQL-EASVAIDFRSEAYRDAYSRIN
tr|D4TEY2|D4TEY2_9NOST|-----MQQLVEQIEKTFQSAKYKDAYSRIN
tr|D4TRY1|D4TRY1_9NOST|-----MQQLVEQIEKTFQSAKYKDAYSRIN
tr|K9V615|K9V615_9CYAN|-----MQQL-EAELKIDFNSEIYKDAYSRIN
tr|K9PTP6|K9PTP6_9CYAN|-----MQQLTEQ--SEIDFQSEIYKDSYSRIN
tr|K7WTY7|K7WTY7_9NOST|-----MQQLVDQIEKIDFQSKIYKDAYSRIN
tr|K9WRL8|K9WRL8_9NOST|-----MQQLIADQVEKMDFQSEYKDAYSRIN
tr|K9ZJT3|K9ZJT3_ANACC|-----MQQLVEQIEKIDFQSEYKDAYSRIN
tr|D7E2W1|D7E2W1_NOSA0|-----MQQLVEEIEKIDFQSEYKDAYSRIN
tr|Q112R8|Q112R8_TRIEI|-----MPKLEIIPMTD--S-----QSETKLEKVKSQSEGDQINFETETYKDAYSRIN
sp|Q54764|ALDEC_SYNE7|-----MPQL-EASLELDFQSEYKDAYSRIN
tr|Q8KPT4|Q8KPT4_SYNE7|----M RTPWDPPNPTFLSS-----VSGDRRLMPQL-EASLELDFQSEYKDAYSRIN
tr|Q5N627|Q5N627_SYNP6|----M RTPWDPPNPTFLSS-----VSGDRRLMPQL-EASLELDFQSEYKDAYSRIN
tr|K9RFH5|K9RFH5_9CYAN|-----MQEL-ISPSELDYRSEYKSAF SRIN
tr|K9TXF6|K9TXF6_9CYAN|-----MQQV-AATSEIDFHSEYKDAYSRIN
tr|K9X9I4|K9X9I4_9CHRO|-----MQQLAATAELDFHSEYKDAYSRIN
tr|A0Z9X5|A0Z9X5_NODSP|-----MQQL-AAELKIDFQSEYKDAYSRIN
tr|Q3MA38|Q3MA38_ANAVT|-----MQQV-AADLEIDFKSEYKDAYSRIN
```

1.....10.....20.....  
: . \*::: \*::

|    |        |              |                                                         |
|----|--------|--------------|---------------------------------------------------------|
| tr | Q8YLL5 | Q8YLL5_NOSS1 | -----MQQV-AADLEIDFKSEYKDAYSRIN                          |
| tr | K9QXA2 | K9QXA2_NOSS7 | -----MQQI-AGDLEIDFKSEYKDAYSRIN                          |
| tr | M1X0T0 | M1X0T0_9NOST | -----MTMQQL-ATQSEIDFSSEIYKDAYSRIN                       |
| tr | M1WVU9 | M1WVU9_9NOST | -----MQQL-ATQSEIDFSSEIYKDAYSRIN                         |
| tr | K9S7C1 | K9S7C1_9CYAN | -----MPQL-EASLELDFHSETYKDAYSRIN                         |
| tr | K9W4T2 | K9W4T2_9CYAN | -----MAQ---IAASIDFQSEYKDAYSRIN                          |
| tr | G6FV22 | G6FV22_9CYAN | -----MQQL-ADQPEIDFHSETYKDAYSRIN                         |
| tr | W5U379 | W5U379_9CYAN | -----MYH-----IFRSGRTMQQL-ANQPDIDFKSETYKDAYSRIN          |
| tr | W5U417 | W5U417_9CYAN | -----MYH-----IFRSGRTMQQL-ANQPDIDFKSETYKDAYSRIN          |
| tr | K9QA48 | K9QA48_9NOSO | -----MQQL-AAELEIDFQSEYKDAYSRIN                          |
| tr | G9HTG5 | G9HTG5_9NOSO | -----MQPL-AAELEIDFQSEYKDAYSRIN                          |
| tr | H2DDT7 | H2DDT7_NOSS6 | -----MQPL-AAELEIDFQSEYKDAYSRIN                          |
| tr | K9YV86 | K9YV86_DACSA | -----MQD-VAVTPTLDYTSETYKDAYSRIN                         |
| tr | K9Y9U4 | K9Y9U4_HALP7 | -----MQD-VAVTPTLDYNSSETYKDAYSRIN                        |
| tr | W5U332 | W5U332_PLAAG | -----MPQVEA--ITIDFQSEYKDAYSRIN                          |
| tr | F5UGX9 | F5UGX9_9CYAN | -----MPQLEA-SPTIDFQTETYKDAYSRIN                         |
| tr | K9VE50 | K9VE50_9CYAN | -----MPQLEA-SPTIDFQTETYKDAYSRIN                         |
| tr | D8FVZ2 | D8FVZ2_9CYAN | -----MQLEA-SPAIDFETATYKDAYSRIN                          |
| tr | B4VSW8 | B4VSW8_9CYAN | -----M-----QTGENLLMQQLTV-SQELDFNSETYKDAYSRIN            |
| tr | K9WII2 | K9WII2_9CYAN | -----MQQLAV-SPEFDFTSSEYKDAYSRIN                         |
| tr | K9TGS5 | K9TGS5_9CYAN | -----MPQLEATSATLDFQSPYKDAYSRIN                          |
| tr | B5W0S5 | B5W0S5_ARTMA | -----MPQLETI-TELDFQNETYKDAYSRIN                         |
| tr | K1WZT6 | K1WZT6_ARTPT | -----MPQLETI-TELDFQNETYKDAYSRIN                         |
| tr | W6SNU7 | W6SNU7_9CYAN | -----MPQLETI-TELDFQNETYKDAYSRIN                         |
| tr | H1WAD2 | H1WAD2_9CYAN | -----MPQLETI-TELDFQNETYKDAYSRIN                         |
| tr | K6DQI0 | K6DQI0_ARTPT | -----MPQLETI-AELDFQNETYKDAYSRIN                         |
| tr | D5A1Z8 | D5A1Z8_ARTPN | -----MPQLETI-AELDFQNETYKDAYSRIN                         |
| tr | U7QM55 | U7QM55_9CYAN | -----MPQLEAI-AEIDFNTNTYKDAYSRIN                         |
| tr | A0YKK4 | A0YKK4_LYNBP | -----MPQLEAI-AEIDFNTNTYKDAYSRIN                         |
| tr | A3Z6M0 | A3Z6M0_9SYNE | -----MTQLDFASAAAYREAYSRIN                               |
| tr | B5ILL6 | B5ILL6_9CHRO | -----MASVA---HPAVAVQPATKPADTAAERGDGLPDFSSDYKDAYSRIN     |
| tr | A3YYU8 | A3YYU8_9SYNE | -----MPSLETTIAASETASASASMAVGGSVQDLGLPDFSSDYKDAYSRIN     |
| tr | A2C7S0 | A2C7S0_PROM3 | -----MPTLEMPV-----AAVLDSVGSSEALPDFTSDAYKDAYSRIN         |
| sp | Q7V6D4 | ALDEC_PROMM  | -----MPTLEMPV-----AAVLDSVGSSEALPDFTSDAYKDAYSRIN         |
| tr | A5GUD0 | A5GUD0_SYNR3 | -----MAS-----SLLDPAVDGTPVLDVELPDFTTEAYKSAYSRIN          |
| tr | K9P3X5 | K9P3X5_CYAGP | -----MPTVATTT-----SVDSLSLDPVGP IEGSDLPDFSTAYKDAYSRIN    |
| tr | Q0I8M9 | Q0I8M9_SYNS3 | -----MPTLDSSTL-----VAVLDDQQGL-AELPDFTTDAYKDAYSRIN       |
| tr | G4FIH8 | G4FIH8_9SYNE | -----MSTLDSTA-----VAVLDDQQGL-AELPDFTTDAYKDAYSRIN        |
| tr | Q05RJ5 | Q05RJ5_9SYNE | -----MPTLNSPE-----VAALSDQDGSASQLPDFSSAYKDAYSRIN         |
| tr | A5GJG5 | A5GJG5_SYNPW | -----MPTPVTSSE-----VAVLDDQAGSAQALPDFSSEAYKDAYSRIN       |
| tr | A4CS34 | A4CS34_SYNPV | -----MPTPVTSSE-----VAVLDEQAGSALLPDFSSEAYKDAYSRIN        |
| tr | A3Z5H6 | A3Z5H6_9SYNE | -----MPTLETSE-----VAVLEDSMASGSRLLPDFTSEAYKDAYSRIN       |
| tr | Q060S1 | Q060S1_9SYNE | -----MLEG---QDALPDFTTAEYKDAYSRIN                        |
| tr | Q3AV61 | Q3AV61_SYNS9 | -----VSVLEG---QDALPDFTTAEYKDAYSRIN                      |
| tr | Q0QKQ4 | Q0QKQ4_9SYNE | -----MPTLNAPV-----ASVMEG---QDALPDFTTAEYKDAYSRIN         |
| tr | Q0QM11 | Q0QM11_9SYNE | -----MPTLNAPD-----AAVVEG---LDALPDFTTAEYKDAYSRIN         |
| tr | Q3ALN2 | Q3ALN2_SYNSC | -----MPTLNAPV-----APVLEG---QDALPDFTTAEYKDAYSRIN         |
| tr | W0GVR9 | W0GVR9_9SYNE | -----MPTLNAPV-----APVLEG---QDALPDFTTAEYKDAYSRIN         |
| tr | Q0QKF3 | Q0QKF3_9SYNE | -----MPTLNAPV-----AAVVEG---LDALPDFTTAEYKDAYSRIN         |
| tr | Q7U5G9 | Q7U5G9_SYNPX | -----MPTLNAPV-----AAVVEG---LDALPDFTTAEYKDAYSRIN         |
| tr | Q0QKK1 | Q0QKK1_9SYNE | -----MPTLNAPV-----AAVVEG---LDALPDFTTAEYKDAYSRIN         |
| tr | A2C0Z0 | A2C0Z0_PROM1 | -----MQAFASNN-----LT--VEKEELSSDSLPDFTSEYKDAYSRIN        |
| tr | Q46GP5 | Q46GP5_PROMT | -----MQAFASNN-----LT--VEKEELSSDSLPDFTSEYKDAYSRIN        |
| tr | A8G3P7 | A8G3P7_PROM2 | -----MNKSLTDMQTLSEK-----DIQLEGSTDNDSANLPDFTTDAYKDAYSRIN |
| tr | A2BVJ4 | A2BVJ4_PROM5 | -----MQTLESNK-----NIQIGSSPESDSANLPDFTTDAYKDAYSRIN       |
| tr | Q7V2E8 | Q7V2E8_PROMP | -----MQTLESNK-----KT-N---LENSIDLPDFTTDSYKDAYSRIN        |
| tr | Q31C02 | Q31C02_PROM9 | MH--NELKITDMQTLTNT-----KT-TEESIDTNSLNLPDFTTDSYKDAYSRIN  |
| tr | A2BQ13 | A2BQ13_PROMS | MH--NELKITDMQTLSEK-----KT-IEESINPISLDLPDFTTDSYKDAYSRIN  |
| tr | A3PBQ6 | A3PBQ6_PROM0 | MH--NELKITDMQTLSEK-----KT-IEESINPISLDLPDFTTDSYKDAYSRIN  |
| tr | A9BEF6 | A9BEF6_PROM4 | -----MPTLESSE-----VA-VISDLEGRDGLSLPDFTTEQYKDAYSRIN      |
| tr | Q7VD51 | Q7VD51_PROMA | -----MQTLTN-----QVASADELDNLPDFSSSQYKDAYSRIN             |
| tr | B8HLW2 | B8HLW2_CYAP4 | -----MSDCATNPALDYSETYRDAYRRV                            |
| tr | U9VZT6 | U9VZT6_9CYAN | -----MSHSVADQTLDFYSDTYRDAFTRIN                          |
| tr | K9EQR0 | K9EQR0_9CYAN | -----MPYSAVDQTLDFHSDTYRDAFTRIN                          |

..30.....40.....50.....60.....70.....80.....  
.:\*: \*\* \* .: : : : : \* . \*\* \* \* . \* . \* . \* . \* .

|    |        |              |                                                               |
|----|--------|--------------|---------------------------------------------------------------|
| sp | B2J1M1 | ALDEC_NOSP7  | AIVIEGEQEAHENYITLAQLLPESHDELIRLSKMESRHHKGFACGRNLAVTPDLQFAKE   |
| tr | U5QDK0 | U5QDK0_9CYAN | AIVLEGEREACANYLALAEALLPDHADALKKLSAMENRHFKGFQSCARNLEVTDPDEFARR |
| tr | Q7NGM3 | Q7NGM3_GLOVI | AIVLEGEREAHANYLTLAEMLPDHAELKLAAMENRHFKGFQSCARNLEVTDPDEFARR    |
| tr | Q2JJ13 | Q2JJ13_SYNJB | GIVIEGEQEAHDNYLKLAEMLPEGAEEHLKLAEMELRHHKGFQSCGKNLQVPEDFEFART  |
| tr | Q2JX62 | Q2JX62_SYNJA | GIVIEGEQEAHDNYLKLAEMLPEAAEELRKLAKMELRHHKGFQACGKNLQVPEDFEFARA  |
| tr | K9RTZ6 | K9RTZ6_SYN3  | GIVIEGEQEAHENYISLTKLIPDYEEEDLRLSKMEARHKKGFACGRNLAVSPDLDFAEK   |
| tr | Q8DJB4 | Q8DJB4_THEEB | AIVIEGEQEAHDNYIDLAKLLPQHQQEELTRLAKMEARHKKGFACGRNLVTPDMEFAKA   |
| tr | V5V382 | V5V382_9CHRO | AIVIEGEQKACDNYIDLAKLLPQHQQEELTRLAKMEARHKKGFACGRNLVTPDMEFAKA   |
| tr | B0C9L0 | B0C9L0_ACAM1 | GIVIEGEQEAHENYIRLGEMLPDQDDFIRLSKMEARHKKGFACGRNLKVTCDLDFARR    |
| tr | B8HSZ3 | B8HSZ3_CYAP4 | AIVIEGEQEAHDNYLKLTELLPDCQEDLVRLLAKMEARHKKGFACGRNLKVTCDLDFARR  |
| tr | L8LLH3 | L8LLH3_9CHRO | AIVIEGEHEAYQNYITLGDMLPDVQAEELVRLAKMESRHHKGFQSCGKNLQVPEDFEFART |
| tr | K9Z5G1 | K9Z5G1_CYAAP | AIVIEGEQEAHDNYMDMIPMLPNHEKELASLAKMEFRHKKGFQSCGRNLVTPDMEFAQK   |
| tr | I4FNH9 | I4FNH9_MICAE | AIVIEGEYEANSNYIQLADILTDNKEELHRLAKMENRHHKGFQACGRNLQITPDMYARA   |
| tr | I4I7T6 | I4I7T6_9CHRO | AIVIEGEYEANSNYIQLADILADNKEELHRLAKMENRHHKGFQACGQNLQITPDMYARE   |
| tr | I4HKI6 | I4HKI6_MICAE | AIVIEGEYEANSNYIQLADILTDNKEELHRLAKMENRHHKGFQACGQNLQITPDMYARE   |
| tr | B0JY93 | B0JY93_MICAN | AIVIEGEYEANSNYIQLADILTDNKEELHRLAKMENRHHKGFQACGQNLQITPDMYARE   |
| tr | I4GYG9 | I4GYG9_MICAE | AIVIEGEYEANSNYIQLADILTDNKEELHRLAKMENRHHKGFQACGQNLQITPDMYARE   |
| tr | I4IM50 | I4IM50_MICAE | AIVIEGEYEANSNYIQLADILTDNKEELHRLAKMENRHHKGFQACGQNLQITPDMYARE   |
| tr | I4FD05 | I4FD05_MICAE | AIVIEGEYEANSNYIQLADILTDNKEELHRLAKMENRHHKGFQACGQNLQITPDMYARE   |
| tr | L7E3D3 | L7E3D3_MICAE | AIVIEGEYEANSNYIQLADILTDNKEELHRLAKMENRHHKGFQACGQNLQITPDMYARE   |
| tr | L8NP18 | L8NP18_MICAE | AIVIEGEYEANSNYIQLADILTDNKEELHRLAKMENRHHKGFQACGQNLQITPDMYARE   |
| tr | A8YJ06 | A8YJ06_MICAE | AIVIEGEYEANSNYIQLADILTDNKEELHRLAKMENRHHKGFQACGQNLQITPDMYARE   |
| tr | S3JGS6 | S3JGS6_MICAE | AIVIEGEYEANSNYIQLADILTDNKEELHRLAKMENRHHKGFQACGQNLQITPDMYARE   |
| tr | I4GKL8 | I4GKL8_MICAE | AIVIEGEYEANSNYIQLADILTDNKEELHRLAKMENRHHKGFQACGQNLQITPDMYARE   |
| tr | I4HLI6 | I4HLI6_MICAE | AIVIEGEYEANSNYIQLADILTDNKEELHRLAKMENRHHKGFQACGQNLQITPDMYARE   |
| tr | I4FY74 | I4FY74_MICAE | AIVIEGEYEANSNYIQLADILTDNKEELHRLAKMENRHHKGFQACGQNLQITPDMYARE   |
| tr | I4H417 | I4H417_MICAE | AIVIEGEYEANSNYIQLADILTDNKEELHRLAKMENRHHKGFQACGQNLQITPDMYARE   |
| tr | M1LIQ1 | M1LIQ1_9SYNC | AIVIEGEQEAHSNYLQMAELLPEDEKELTRLAKMENRHHKGFQACGNNLQVNPDMPYAQE  |
| tr | H0NYN3 | H0NYN3_9SYNC | AIVIEGEQEAHSNYLQMAELLPEDEKELTRLAKMENRHHKGFQACGNNLQVNPDMPYAQE  |
| tr | H0PB35 | H0PB35_9SYNC | AIVIEGEQEAHSNYLQMAELLPEDEKELTRLAKMENRHHKGFQACGNNLQVNPDMPYAQE  |
| tr | H0PG18 | H0PG18_9SYNC | AIVIEGEQEAHSNYLQMAELLPEDEKELTRLAKMENRHHKGFQACGNNLQVNPDMPYAQE  |
| tr | F7US88 | F7US88_SYNYG | AIVIEGEQEAHSNYLQMAELLPEDEKELTRLAKMENRHHKGFQACGNNLQVNPDMPYAQE  |
| sp | Q55688 | ALDEC_SYNY3  | AIVIEGEQEAHSNYLQMAELLPEDEKELTRLAKMENRHHKGFQACGNNLQVNPDMPYAQE  |
| tr | D3EPA5 | D3EPA5_ATETH | AIVIEGEQEAHQNYIDMAQLLPEHQEELIRLSKMEARHKKGFACGNNLQVNPDMQYAE    |
| tr | B7JUH1 | B7JUH1_CYAP8 | AIVIEGEQEAHQNYIDMAQLLPEHQEELIRLSKMEARHKKGFACGNNLQVNPDMQYAE    |
| tr | C7QUV0 | C7QUV0_CYAP0 | AIVIEGEQEAHQNYIDMAQLLPEHQEELIRLSKMEARHKKGFACGNNLQVNPDMQYAE    |
| tr | G5J0P0 | G5J0P0_CROWT | AIVIEGEQEAHENYIDMGELLPDGKDELIRLSKMEARHKKGFACGKNLQVNPDMQYAE    |
| tr | T2JF13 | T2JF13_CROWT | AIVIEGEQEAHENYIDMGELLPDGKDELIRLSKMEARHKKGFACGKNLQVNPDMQYAE    |
| tr | Q4C7T3 | Q4C7T3_CROWT | AIVIEGEQEAHENYIDMGELLPDGKDELIRLSKMEARHKKGFACGKNLQVNPDMQYAE    |
| tr | T2IH71 | T2IH71_CROWT | AIVIEGEQEAHQNYIDMAQLLPEDEAELIRLSKMEARHKKGFACGKNLQVNPDMQYAE    |
| tr | A3INE1 | A3INE1_9CHRO | AIVIEGEQEAHQNYIDMAQLLPEDEAELIRLSKMEARHKKGFACGKNLQVNPDMQYAE    |
| tr | B1WR71 | B1WR71_CYAA5 | AIVIEGEMEAKGNYTQLAETLLPDSAEDELIRLSKMEARHKKGFACGKNLQVNPDMQYAE  |
| tr | U5DFA3 | U5DFA3_9CHRO | AIVIEGEMEAKGNYTQLAETLLPDSAEDELIRLSKMEARHKKGFACGKNLQVNPDMQYAE  |
| tr | L8N0G8 | L8N0G8_9CYAN | AIVIEGEAEAHSNYLQLAELMPEFNEELHRLAKMEDRHHKGFACGKNLQVNPDMQYAE    |
| tr | K9SPY2 | K9SPY2_9CYAN | AIVIEGEQEAHDNYLQGLGELLPELKTETAGLAKMENRHHKGFACGRNLQVNPDMQYAE   |
| tr | K9SZC3 | K9SZC3_9SYNE | AIVIEGEQEAHDNYLQGLGELLPELKTETAGLAKMENRHHKGFACGRNLQVNPDMQYAE   |
| tr | B4WJ48 | B4WJ48_9SYNE | AIVIEGELEANNKYQLSEHLGDFKDDLKLAEMENRHHKGFQACGKNLQVNPDMQYAE     |
| tr | U9WC11 | U9WC11_9CYAN | AIVIEGELEANNKYQLSEHLGDFKDDLKLAEMENRHHKGFQACGKNLQVNPDMQYAE     |
| tr | W5U411 | W5U411_9CYAN | AIVIEGEWEANDNYQTLAEHLSHDKDELIRLSKMEARHKKGFQACGKNLQVNPDMQYAE   |
| tr | K9F0G4 | K9F0G4_9CYAN | AIVIEGEWEANDNYQTLAEHLSHDKDELIRLSKMEARHKKGFQACGKNLQVNPDMQYAE   |
| tr | K9ULL9 | K9ULL9_9CHRO | AIVIEGEQEAHENYITLSGELLPPDQDDLKLAEMENRHHKGFACGKNLQVNPDMQYAE    |
| tr | K8GFP8 | K8GFP8_9CYAN | AIVIEGEQEAHENYITLSGELLPPDQDDLKLAEMENRHHKGFACGKNLQVNPDMQYAE    |
| tr | D4TEY2 | D4TEY2_9NOST | AIVIEGEQEAHENYITLSGELLPPDQDDLKLAEMENRHHKGFACGKNLQVNPDMQYAE    |
| tr | D4TRY1 | D4TRY1_9NOST | AIVIEGEQEAHENYITLSGELLPPDQDDLKLAEMENRHHKGFACGKNLQVNPDMQYAE    |
| tr | K9V615 | K9V615_9CYAN | AIVIEGEQEAHENYITLSGELLPPDQDDLKLAEMENRHHKGFACGKNLQVNPDMQYAE    |
| tr | K9PTP6 | K9PTP6_9CYAN | AIVIEGEQEAHDNYIKLAEMLPDKDELIRLSKMEARHKKGFACGRNLQVNPDMQYAE     |
| tr | K7WY77 | K7WY77_9NOST | AIVIEGEQEAHDNYIKLAEMLPDKDELIRLSKMEARHKKGFACGRNLQVNPDMQYAE     |
| tr | K9WRL8 | K9WRL8_9NOST | AIVIEGEQEAHDNYIKLAEMLPDKDELIRLSKMEARHKKGFACGRNLQVNPDMQYAE     |
| tr | K9ZJT3 | K9ZJT3_ANACC | AIVIEGEQEAHDNYIKLAEMLPDKDELIRLSKMEARHKKGFACGRNLQVNPDMQYAE     |
| tr | D7E2W1 | D7E2W1_NOSA0 | AIVIEGEQEAHDNYIKLAEMLPDKDELIRLSKMEARHKKGFACGRNLQVNPDMQYAE     |
| tr | Q112R8 | Q112R8_TRIEI | AIVIEGEQEAHDNYIKLAEMLPDKDELIRLSKMEARHKKGFACGRNLQVNPDMQYAE     |
| sp | Q54764 | ALDEC_SYNE7  | AIVIEGEQEAHDNYIKLAEMLPDKDELIRLSKMEARHKKGFACGRNLQVNPDMQYAE     |
| tr | Q8KPT4 | Q8KPT4_SYNE7 | AIVIEGEQEAHDNYIKLAEMLPDKDELIRLSKMEARHKKGFACGRNLQVNPDMQYAE     |
| tr | Q5N627 | Q5N627_SYN6  | AIVIEGEQEAHDNYIKLAEMLPDKDELIRLSKMEARHKKGFACGRNLQVNPDMQYAE     |
| tr | K9RFH5 | K9RFH5_9CYAN | AIVIEGEQEAHDNYIKLAEMLPDKDELIRLSKMEARHKKGFACGRNLQVNPDMQYAE     |
| tr | K9TXF6 | K9TXF6_9CYAN | AIVIEGEQEAHDNYIKLAEMLPDKDELIRLSKMEARHKKGFACGRNLQVNPDMQYAE     |
| tr | K9X9I4 | K9X9I4_9CHRO | AIVIEGEQEAHDNYIKLAEMLPDKDELIRLSKMEARHKKGFACGRNLQVNPDMQYAE     |
| tr | A0Z9X5 | A0Z9X5_NODSP | AIVIEGEQEAHDNYIKLAEMLPDKDELIRLSKMEARHKKGFACGRNLQVNPDMQYAE     |
| tr | Q3MA38 | Q3MA38_ANAVT | AIVIEGEQEAHDNYIKLAEMLPDKDELIRLSKMEARHKKGFACGRNLQVNPDMQYAE     |

```

..30.....40.....50.....60.....70.....80.....
.:*: ** * .: : : : * . ** * * . * . * . * . * .
tr|Q8YLL5|Q8YLL5_NOSS1|AIVIEGEQEAYENYIQLSOLLPDDKEDLIRLSKMESRHHKGFQEACGRNLQVSPDMFAKE
tr|K9QXA2|K9QXA2_NOSS7|AIVIEGEQEAYDNYIQLAEMLPHEHKDELIRLSKSMENRHHKGFQEACGRNLEVSPDMQFAKE
tr|M1X0T0|M1X0T0_NOSS1|AIVIEGEQEAEHENYITLAEMLPENEQLIRLSQMESRHHKGFQEACGRNLQVAPDMKFAK
tr|M1WVU9|M1WVU9_NOSS1|AIVIEGEQEAEHENYITLAEMLPENEQLIRLSQMESRHHKGFQEACGRNLQVAPDIKFAKN
tr|K9S7C1|K9S7C1_9CYAN|AIVIEGEQEAYENYLKLAELLDPNQDELVRLSKMESRHHKGFQEACGRNLEVTPDMDFAKA
tr|K9W4T2|K9W4T2_9CYAN|AIVIEGEQEAYENYTKLAELLPEESKDELIRLSKMEMRHHKGFQEACGRNLQVTADLEFARN
tr|G6FV22|G6FV22_9CYAN|AIVIEGEQEAEHENYLKLAELLSEHKDDLIRLAKMESRHHKGFQEACGRNLQVTPDI EFAKQ
tr|W5U379|W5U379_9CYAN|AIVIEGEQEAEHENYLKLAELLSEHKDDLIRLSKMESRHHKGFQEACGRNLQVTPDLEFAKQ
tr|W5U417|W5U417_9CYAN|AIVIEGEQEAEHENYLKLAELLSEHKDDLIRLSKMESRHHKGFQEACGRNLQVTPDLEFAKQ
tr|K9QA48|K9QA48_9NOSO|AIVIEGEQEAYENYIKLAELLPANHDQLIGLSKMESRHHKGFQEACGRNLKVTPDLQFAKE
tr|G9HTG5|G9HTG5_9NOSO|AIVIEGEQEAYDNYIKLAELLPANHDQLIGLSKMESRHHKGFQEACGRNLKVTPDLQFAKE
tr|H2DDT7|H2DDT7_NOSS6|AIVIEGEQEAYENYIKLAELLPANHDQLIGLSKMESRHHKGFQEACGRNLKVTPDLQFAKE
tr|K9YV86|K9YV86_DACSA|AIVIEGEQEAKDNYLHLIQLLPDSKDELIRLSKMEARHHKGFQEACGRNLSVTPDMEFAQE
tr|K9Y9U4|K9Y9U4_HALP7|AIVIEGEQEAKDNYLHLIELLPDSKEELTRLSKMEARHHKGFQEACGRNLSVTPDMEFAQE
tr|W5U332|W5U332_PLAAG|AIVIEGEQEAYDNYIKLAELLPEQENLQGLAKMEMSHKRGFQEACGRNLQVADLDFANQ
tr|F5UGX9|F5UGX9_9CYAN|AIVIEGEQEAYDNYLTLAELLADKKAELIGLSKMEMRHHKGFQEACGRNLKVTPDMAFAKQ
tr|K9VE50|K9VE50_9CYAN|AIVIEGEQEAYDNYLTLAELLADKKAELVGLSKMEMRHHKGFQEACGRNLKVTPDMAFAKE
tr|D8FVZ2|D8FVZ2_9CYAN|AIVIEGEQEAYDNYIRLGEMLPDQKDLVLIALS KMEMRHHKGFQEACGRNLKVTPDMEFAKD
tr|B4VSW8|B4VSW8_9CYAN|AIVIEGEQEAEADNYIKLGEMLPEEREELIRLSKMEKRHHKGFQEACGRNLSVTPDMEFAKE
tr|K9WII2|K9WII2_9CYAN|AIVIEGEQEAEADNYITLAQLLDPDKDELIRLSKMESRHHKGFQEACGRNLSVTPDMEFAKQ
tr|K9TGS5|K9TGS5_9CYAN|AIVIEGEQEAEADNYIKLGEMLPDCKDELIRLSKMEKRHHKGFQEACGRNLSVTPDMEFAKE
tr|B5W0S5|B5W0S5_ARTMA|AIVIEGEQEAEADNYIKLGEMLPEEREELIRLSKMEKRHHKGFQEACGRNLSVTPDMEFAGRE
tr|K1WZT6|K1WZT6_ARTPT|AIVIEGEQEAEADNYIKLGEMLPEEREELIRLSKMEKRHHKGFQEACGRNLSVTPDMEFAGRE
tr|W6SNU7|W6SNU7_9CYAN|AIVIEGEQEAEADNYIKLGEMLPEEREELIRLSKMEKRHHKGFQEACGRNLSVTPDMEFAGRE
tr|H1WAD2|H1WAD2_9CYAN|AIVIEGEQEAEADNYIKLGEMLPEEREELIRLSKMEKRHHKGFQEACGRNLSVTPDMEFAGRE
tr|K6DQI0|K6DQI0_ARTPT|AIVIEGEQEAEADNYIKLGEMLPEEREELIRLSKMEKRHHKGFQEACGRNLSVTPDMEFAGRE
tr|D5A1Z8|D5A1Z8_ARTPN|AIVIEGEQEAYDNYIKLGEMLPEEREELIRLSKMEKRHHKGFQEACGRNLSVTPDMEFAGRE
tr|U7QM55|U7QM55_9CYAN|AIVIEGEQEAEADNYIKLGEMLPEHEKDELVRLSKMEKRHHKGFQEACGRNLSVTPDMEYARQ
tr|A0YKK4|A0YKK4_LYNBP|AIVIEGEQVAHDNYIKLGEMLPDQKDELVRLSKMEKRHHKGFQEACGRNLSVTPDMDYAHQ
tr|A3Z6M0|A3Z6M0_9SYNE|GVVIVGEGLANRHFQKMLAERIPADRDELQRLGRMEGDHASAFVGCGRNLGVVADLPLARR
tr|B5ILL6|B5ILL6_9CHRO|AIVIEGEQEAEADNYIALGTLIPDQADELAKLARMELKHHKGFQEACANNLGVADMPFAKE
tr|A3YYU8|A3YYU8_9SYNE|AIVIEGEQEAEADNYIALGTLIPDQAEELERLARMELKHHKGFQEACARNLSVTADMPFAKE
tr|A2C7S0|A2C7S0_PROM3|AIVIEGEQEAEADNYIALGTLIPDHVEELKRLAKMEMRHHKGFQEACGRNLGVADMPFAKE
tr|Q7V6D4|ALDEC_PROMM|AIVIEGEQEAEADNYIALGTLIPDHVEELKRLAKMEMRHHKGFQEACGRNLGVADMPFAKE
tr|A5GUD0|A5GUD0_SYNR3|AIVIEGEQEAEADNYIALGTLIPDQADELALQARMEMKHHKGFQEACGRNLSVTPDMPVFAKE
tr|K9P3X5|K9P3X5_CYAGP|AIVIEGEQEAEADNYIALGTLIPDQAEELARLARMELKHHKGFQEACGRNLSVTPDMPFAQE
tr|Q0I8M9|Q0I8M9_SYNS3|AIVIEGEQEAEADNYIALGTLIPDQAEELAKLAKMEMKHHKGFQEACARNLDVVADMPFAQE
tr|G4FIH8|G4FIH8_9SYNE|AIVIEGEQEAEADNYIALGTLIPDQAEELAKLAKMEMKHHKGFQEACARNLDVVADMPFAQE
tr|Q05RJ5|Q05RJ5_9SYNE|AIVIEGEQEAEADNYIALGTLIPDQADELAKLARMEMKHHKGFQEACGRNLSVTPDMPFART
tr|A5GJG5|A5GJG5_SYNPW|AIVIEGEQEAEADNYIALGTLIPDQADELALARMEMKHHKGFQEACGRNLSVTPDMPFAKE
tr|A4CS34|A4CS34_SYNPV|AIVIEGEQEAEADNYIALGTLIPDQADELALARMEMKHHKGFQEACGRNLSVTPDMPFAKT
tr|A3Z5H6|A3Z5H6_9SYNE|AIVIEGEQEAEADNYIALGTLIPDQADELALARMEMKHHKGFQEACGRNLSVTPDMPFAKE
tr|Q060S1|Q060S1_9SYNE|AIVIEGEQEAEADNYIALGTLIPDQAEELSRALARMEMKHHKGFQEACARNLGVADMPFAKE
tr|Q3AV61|Q3AV61_SYNS9|AIVIEGEQEAEADNYIALGTLIPDQADELALARMEMKHHKGFQEACARNLGVADMPFAKD
tr|Q0QKQ4|Q0QKQ4_9SYNE|AIVIEGEQEAEADNYIALGTLIPDQAEELARLARMEMKHHKGFQEACGRNLGVADMPFAK
tr|Q0QM11|Q0QM11_9SYNE|AIVIEGEQEAEADNYIALGTLIPDQKDELARLARMEMKHHKGFQEACGRNLGVADMPFAKT
tr|Q3ALN2|Q3ALN2_SYNSC|AIVIEGEQEAEADNYIALGTLIPDQAEELKRLARMEMKHHKGFQEACGRNLGVADMPFAK
tr|W0GVR9|W0GVR9_9SYNE|AIVIEGEQEAEADNYIALGTLIPDQAEELKRLARMEMKHHKGFQEACGRNLGVADMPFAK
tr|Q0QKF3|Q0QKF3_9SYNE|AIVIEGEQEAEADNYIALGTLIPDQKDELAKLARMEMKHHKGFQEACGRNLGVADMPFAK
tr|Q7U5G9|Q7U5G9_SYNPX|AIVIEGEQEAEADNYIALGSLIPDQKDELAKLARMEMKHHKGFQEACGRNLGVADMPFAK
tr|Q0QKK1|Q0QKK1_9SYNE|AIVIEGEQEAEADNYIALGSLIPDQKDELAKLARMEMKHHKGFQEACGRNLGVADMPFAKT
tr|A2C0Z0|A2C0Z0_PROM1|AVVIEGEQEAYSNFLDLAKLIPHADELVRLGKMEKHHMNGFCAGRNLAVKPDMPFAKT
tr|Q46GP5|Q46GP5_PROMT|AVVIEGEQEAYSNFLDLAKLIPHADELVRLGKMEKHHMNGFCAGRNLAVKPDMPFAKT
tr|A8G3P7|A8G3P7_PROM2|AIVIEGEQEAYDNYISIALTLLPNDSEELTKLAKMELKHHKGFQEACGRNLGVADMPFAKE
tr|A2BVJ4|A2BVJ4_PROM5|AIVIEGEQEAYDNYISIALTLLPNDSEELTKLAKMELKHHKGFQEACGRNLGVADMPFAKE
tr|Q7V2E8|Q7V2E8_PROMP|AIVIEGEQEAEADNYISIALTLLPNELEELTKLAKMELKHHKGFQEACGRNLGVADMPFAKE
tr|Q31C02|Q31C02_PROM9|AIVIEGEQEAEADNYISIALTLLPNELEELTKLAKMELKHHKGFQEACGRNLGVADMPFAK
tr|A2BQ13|A2BQ13_PROMS|AIVIEGEQEAEADNYISIALTLLPNEVEELTKLAKMELKHHKGFQEACGRNLGVADMPFAK
tr|A3PBQ6|A3PBQ6_PROM0|AIVIEGEQEAEADNYISIALTLLPNEVEELTKLAKMELKHHKGFQEACGRNLDVVADMPFAK
tr|A9BEF6|A9BEF6_PROM4|AIVIEGEQEAEADNYISIALTLLPNEVEELTKLAKMELKHHKGFQEACGRNLGVADMPFAQR
tr|Q7VD51|Q7VD51_PROMA|AIVIEGEQEAEADNYISIALTLLPNEVEELTKLAKMELKHHKGFQEACGRNLGVADMPFAEK
tr|B8HLW2|B8HLW2_CYAP4|GIVIEGEQEAYDNYIRLAEMLPEYQAEELTRLSKMEARHKSFAVGCGRNLKVSPDLDFANQ
tr|U9VZT6|U9VZT6_9CYAN|GIVIEGEQEAYDNYIRLAEMLPEYQAEELTRLSKMEARHKSFAVGCGRNLKVIPDLDFANQ
tr|K9EQR0|K9EQR0_9CYAN|GIVIEGEQEAYDNYIRLAEMLPEYQAEELVRLGKMEGRHKSFAVGCGRNLKVIPDLDFANQ

```

```
..90.....100 .....110.....120.....130.....140....
* * * * * * * * * * * * * * * * * * * * * * * * * * * *
```

| sp | B2J1M1 | ALDEC_NOSP7  | FFSGLHQNFTA...                    |
|----|--------|--------------|-----------------------------------|
| tr | U5QDK0 | U5QDK0_9CYAN | YFAGLDANFQRAA...SGDIAACMVIQALIECF |
| tr | Q7NGM3 | Q7NGM3_GLOVI | YFEQLDGNFQAAA...EGDLTTCMVIQALIECF |
| tr | Q2JJ13 | Q2JJ13_SYNJB | FFAPLRNNFQAAA...AGDLVTCVVIQSLIECF |
| tr | Q2JX62 | Q2JX62_SYNJA | FFAPLRDNFQAAA...AGDLVSCFVIQSLIECF |
| tr | K9RTZ6 | K9RTZ6_SYN3  | FFADLHNNFQAAA...EGKIATCLVIQALIECF |
| tr | Q8DJB4 | Q8DJB4_THEEB | FFEKLRANFQAAA...EGKTATCLLIQALIECF |
| tr | V5V382 | V5V382_9CHRO | FFEKLHGNFQAAA...EGKIATCLLIQALIECF |
| tr | B0C9L0 | B0C9L0_ACAM1 | FFSDLHKNFQAAA...EDKVPTCLVIQSLIECF |
| tr | B8HSZ3 | B8HSZ3_CYAP4 | FFADLHNNFQAAA...ANKIATCLVIQALIECF |
| tr | L8LLH3 | L8LLH3_9CHRO | FFAKLHGNFQAAA...EGKIVTCFVIQSLIECF |
| tr | K9Z5G1 | K9Z5G1_CYAAP | YFAELHSNFKAKE...EGKIVTCLLIQALIECF |
| tr | I4FNH9 | I4FNH9_MICAE | FFSSLHNFQIAYA...EGKVVTCLLIQSLIECF |
| tr | I4I7T6 | I4I7T6_9CHRO | FFSSLHNFQIAYA...EGKVVTCLLIQSLIECF |
| tr | I4HKI6 | I4HKI6_MICAE | FFSSLHNFQIAYA...EGKVVTCLLIQSLIECF |
| tr | B0JY93 | B0JY93_MICAN | FFSSLHNFQIAYA...EGKVVTCLLIQSLIECF |
| tr | I4GYG9 | I4GYG9_MICAE | FFSSLHNFQIAYA...EGKVVTCLLIQSLIECF |
| tr | I4IM50 | I4IM50_MICAE | FFSSLHNFQIAYA...EGKVVTCLLIQSLIECF |
| tr | I4FD05 | I4FD05_MICAE | FFSSLHNFQIAYA...EGKVVTCLLIQSLIECF |
| tr | L7E3D3 | L7E3D3_MICAE | FFSSLHNFQIAYA...EGKVVTCLLIQSLIECF |
| tr | L8NP18 | L8NP18_MICAE | FFSSLHNFQIAYA...EGKVVTCLLIQSLIECF |
| tr | A8YJ06 | A8YJ06_MICAE | FFSSLHNFQIAYA...EGKVVTCLLIQSLIECF |
| tr | S3JGS6 | S3JGS6_MICAE | FFSSLHNFQIAYA...EGKIVTCLLIQSLIECF |
| tr | I4GKL8 | I4GKL8_MICAE | FFSSLHNFQIAYA...EGKIVTCLLIQSLIECF |
| tr | I4HLI6 | I4HLI6_MICAE | FFSSLHNFQIAYA...EGKIVTCLLIQSLIECF |
| tr | I4FY74 | I4FY74_MICAE | FFSSLHNFQIAYA...EGKVVTCLLIQSLIECF |
| tr | I4H417 | I4H417_MICAE | FFSSLHNFQIAYA...EGKVVTCLLIQSLIECF |
| tr | M1LIQ1 | M1LIQ1_9SYNC | FFAGLHGNFQAFS...EGKVVTCLLIQALIECF |
| tr | H0NYN3 | H0NYN3_9SYNC | FFAGLHGNFQAFS...EGKVVTCLLIQALIECF |
| tr | H0PB35 | H0PB35_9SYNC | FFAGLHGNFQAFS...EGKVVTCLLIQALIECF |
| tr | H0PG18 | H0PG18_9SYNC | FFAGLHGNFQAFS...EGKVVTCLLIQALIECF |
| tr | F7US88 | F7US88_SYNYG | FFAGLHGNFQAFS...EGKVVTCLLIQALIECF |
| sp | Q55688 | ALDEC_SYNY3  | FFAGLHGNFQAFS...EGKVVTCLLIQALIECF |
| tr | D3EPA5 | D3EPA5_ATETH | FFSQLHNFQIAKN...EKKVVTCLLIQALIECF |
| tr | B7JUH1 | B7JUH1_CYAP8 | FFSSLHGNFQAKA...EGKIVTCLLIQSLIECF |
| tr | C7QUV0 | C7QUV0_CYAP0 | FFSSLHGNFQAKA...EGKIVTCLLIQSLIECF |
| tr | G5J0P0 | G5J0P0_CROWT | FFSQLHGNFQAKA...EGKIVTCLLIQSLIECF |
| tr | T2JF13 | T2JF13_CROWT | FFSQLHGNFQAKA...EGKIVTCLLIQSLIECF |
| tr | Q4C7T3 | Q4C7T3_CROWT | FFSQLHGNFQAKA...EGKIVTCLLIQSLIECF |
| tr | T2IH71 | T2IH71_CROWT | FFSQLHGNFQAKA...EGKIVTCLLIQSLIECF |
| tr | A3INE1 | A3INE1_9CHRO | FFSQLHGNFQAKA...EGKIVTCLLIQSLIECF |
| tr | B1WR71 | B1WR71_CYAA5 | FFAELHGNFQAKA...EGKIVTCLLIQSLIECF |
| tr | U5DFA3 | U5DFA3_9CHRO | YFARLHGNFQALA...DGDVVAFLIQLSIECF  |
| tr | L8N0G8 | L8N0G8_9CYAN | FFSELHNFQAKA...IGDIVTCLLIQSLIECF  |
| tr | K9SPY2 | K9SPY2_9CYAN | FFAQLHGNFQAAA...EGDVVTCLLIQSLIECF |
| tr | K9SZC3 | K9SZC3_9SYNE | FFNALHGNFQAKA...ITDVVTCLLIQSLIECF |
| tr | B4WJ48 | B4WJ48_9SYNE | FFAQLHNFQATA...EGKIVTCLLIQSLIECF  |
| tr | U9WC11 | U9WC11_9CYAN | FFSKLHNFQRAD...EGKIVTCLLIQSLIECF  |
| tr | W5U411 | W5U411_9CYAN | FFAKLHNFQQAQD...EGKIVTCLLIQSLIECF |
| tr | K9F0G4 | K9F0G4_9CYAN | FFAKLHNFQQAQD...EGKVVTCLLIQSLIECF |
| tr | K9ULL9 | K9ULL9_9CHRO | FFAQLHNFQAAA...AGNIVTCLLIQSLIECF  |
| tr | K8GFP8 | K8GFP8_9CYAN | FFSSLHGNFQAAA...EGKIVTCLLIQSLIECF |
| tr | D4TEY2 | D4TEY2_9NOST | FFSPLHNFQIAAQQPKPVVTCLLIQSLIECF   |
| tr | D4TRY1 | D4TRY1_9NOST | FFSPLHNFQIAAQQG--KVVTCLLIQSLIECF  |
| tr | K9V615 | K9V615_9CYAN | FFAGLHGNFQAAA...EGKVVTCLLIQSLIECF |
| tr | K9PTP6 | K9PTP6_9CYAN | FFSGLHGNFQAAA...AGKVVTCLLIQSLIECF |
| tr | K7WY7  | K7WY7_9NOST  | FFLGLHNFQATA...EGKVVTCLLIQSLIECF  |
| tr | K9WRL8 | K9WRL8_9NOST | FFLGLHGNFQATA...AGKVVTCLLIQSLIECF |
| tr | K9ZJT3 | K9ZJT3_ANACC | FFSGLHGNFQAAA...EGKVVTCLLIQSLIECF |
| tr | D7E2W1 | D7E2W1_NOSA0 | FFSGLHGNFQATA...AGNVTCLLIQSLIECF  |
| tr | Q112R8 | Q112R8_TRIEI | FFEPLHNFQATA...TGNVVTCLLIQSLIECF  |
| sp | Q54764 | ALDEC_SYNE7  | FFERLHNFQAAA...EGKVVTCLLIQSLIECF  |
| tr | Q8KPT4 | Q8KPT4_SYNE7 | FFERLHNFQAAA...EGKVVTCLLIQSLIECF  |
| tr | Q5N627 | Q5N627_SYN6  | FFERLHNFQAAA...EGKVVTCLLIQSLIECF  |
| tr | K9RFH5 | K9RFH5_9CYAN | FFAQLHGNFQAAA...EGKVVTCLLIQSLIECF |
| tr | K9TXF6 | K9TXF6_9CYAN | FFSGLHGNFQAAA...AGQVVTCLLIQSLIECF |
| tr | K9X9I4 | K9X9I4_9CHRO | FFAKLHGNFQAAA...SGNVVTCLLIQSLIECF |
| tr | A0Z9X5 | A0Z9X5_NODSP | FFSGLHGNFQAAA...EGQVVTCLLIQSLIECF |
| tr | Q3MA38 | Q3MA38_ANAVT | FFAGLHGNFQAAA...EGKVVTCLLIQSLIECF |

```

..90.....100 .....110.....120.....130.....140....
* * * * * * * * * * * * * * * * * * * * * * * * * * * *
tr|Q8YLL5|Q8YLL5_NOSS1|FFAGLHGNFQKAAA--EGKIVTCLLIQSLIIECFAIAYNIYIPVADDFARKITEGVVKD
tr|K9QXA2|K9QXA2_NOSS7|FFAELHSNFTAAA--EGKVVTCLLIQSLIIECFAIAYNIYIPVADDFARKITEGVVKD
tr|M1X0T0|M1X0T0_NOSS7|FFADLHNFHTASA--EGKIVTCLLIQSLIIECFAIAYNIYIPVADDFARKITEGVVKD
tr|M1WVU9|M1WVU9_NOSS7|FFADLHNFHTASA--EGKIVTCLLIQSLIIECFAIAYNIYIPVADDFARKITEGVVKD
tr|K9S7C1|K9S7C1_9CYAN|FFADLHNFHTASA--EGKIVTCLLIQSLIIECFAIAYNIYIPVADDFARKITEGVVKD
tr|K9W4T2|K9W4T2_9CYAN|FFSRLHNFQVAAE--AGEIVTCLLIQSLIIECFAIAYNIYIPVADDFARKITEGVVKD
tr|G6FV22|G6FV22_9CYAN|FFAQLHNFQVAAQ--EGKIVTCLLIQSLIIECFAIAYNIYIPVADDFARKITEGVVKD
tr|W5U379|W5U379_9CYAN|FFAQLHNFQVAAQ--EGKIVTCLLIQSLIIECFAIAYNIYIPVADDFARKITEGVVKD
tr|W5U417|W5U417_9CYAN|FFAQLHNFQVAAQ--EGKIVTCLLIQSLIIECFAIAYNIYIPVADDFARKITEGVVKD
tr|K9QA48|K9QA48_9NOSO|FFAPLHNFQVAAA--ENKVVVCLLIQSLIIECFAIAYNIYIPVADDFARKITEGVVKD
tr|G9HTG5|G9HTG5_9NOSO|FFAPLHNFQVAAA--ENKVVVCLLIQSLIIECFAIAYNIYIPVADDFARKITEGVVKD
tr|H2DDT7|H2DDT7_NOSS6|FFAPLHNFQVAAA--TGNVVTCLLIQSLIIECFAIAYNIYIPVADDFARKITEGVVKD
tr|K9YV86|K9YV86_DACSA|FFAELHNFQVAAA--EEKVVTCLLIQSLIIECFAIAYNIYIPVADDFARKITEGVVKD
tr|K9Y9U4|K9Y9U4_HALP7|FFAQLHNFQVAAA--EGKIVTCLLIQSLIIECFAIAYNIYIPVADDFARKITEGVVKD
tr|W5U332|W5U332_PLAAG|FFSSLHNFQVAAA--SGNVVTCLLIQSLIIECFAIAYNIYIPVADDFARKITEGVVKD
tr|F5UGX9|F5UGX9_9CYAN|FFSDLHNFQVAAA--EGQIVTCLLIQSLIIECFAIAYNIYIPVADDFARKITEGVVKE
tr|K9VE50|K9VE50_9CYAN|FFSELHNFQVAAA--QGQIVTCLLIQSLIIECFAIAYNIYIPVADDFARKITEGVVKE
tr|D8FVZ2|D8FVZ2_9CYAN|FFAALHSNFBAAA--AGKVVVCLVIQALIIIECFAIAYNIYIPVADDFARKITEGVVKD
tr|B4VSW8|B4VSW8_9CYAN|YFSDLHNFQVAAA--SGNVVTCLLIQSLIIECFAIAYNIYIPVADDFARKITEGVVKD
tr|K9W1I2|K9W1I2_9CYAN|YFSQLHNFQVAAA--TGNVVTCLLIQSLIIECFAIAYNIYIPVADDFARKITEGVVKD
tr|K9TGS5|K9TGS5_9CYAN|FFSGLHNFQVAAA--EGKVVVCLLIQALIIIESFAIAYNIYIPVADDFARKITEGVVKD
tr|B5W0S5|B5W0S5_ARTMA|FFAKLHGNFQKAAA--EGKLVVCLLIQSLIIECFAIAYNIYIPVADDFARKITEGVVKD
tr|K1WZT6|K1WZT6_ARTPT|FFAKLHGNFQKAAA--EGKLVVCLLIQSLIIECFAIAYNIYIPVADDFARKITEGVVKD
tr|W6SNU7|W6SNU7_9CYAN|FFAKLHGNFQKAAA--EGKLVVCLLIQSLIIECFAIAYNIYIPVADDFARKITEGVVKD
tr|H1WAD2|H1WAD2_9CYAN|FFAKLHGNFQKAAA--EGKLVVCLLIQSLIIECFAIAYNIYIPVADDFARKITEGVVKD
tr|K6DQI0|K6DQI0_ARTPT|FFAQLHGNFQKAAA--EGKLVVCLLIQSLIIECFAIAYNIYIPVADDFARKITEGVVKD
tr|D5A1Z8|D5A1Z8_ARTPN|FFAQLHGNFQKAAA--EGKLVVCLLIQSLIIECFAIAYNIYIPVADDFARKITEGVVKD
tr|U7QM55|U7QM55_9CYAN|FFSQLHNFQVAAA--EGKVVVCLLIQSLIIECFAIAYNIYIPVADDFARKITEGVVQD
tr|A0YKK4|A0YKK4_LYNBP|FFSQLHNFQVAAA--QGKVVVCLLIQSLIIECFAIAYNIYIPVADDFARKITEGVVDD
tr|A3Z6M0|A3Z6M0_9SYNE|LFQPLHDLFKRHHH--DGNRAECLVIQGLIIECFAVAYRHYIPVADDFARKITEGVVND
tr|B5ILL6|B5ILL6_9CHRO|FFAPLHGNFQVAAA--EGKVVVCLLIQALIIIEFAISAYHIYIPVADDFARKITEGVVKD
tr|A3YU08|A3YU08_9SYNE|FFSPLHGNFQVAAA--EGKVVVCLLIQALIIIEFAISAYHIYIPVADDFARKITEGVVKD
tr|A2C7S0|A2C7S0_PROM3|FFAPLRDNFQVAAA--QGKVVVCLLIQALIIIEFAISAYHTYIPVADDFARKITEGVVKD
tr|Q7V6D4|ALDEC_PROMM|FFAPLRDNFQVAAA--QGKVVVCLLIQALIIIEFAISAYHTYIPVADDFARKITEGVVKD
tr|A5GUD0|A5GUD0_SYNR3|FFSDLHGNFRSALE--ENKVVVCLVIQALMIEFAIAYHYIPVADDFARKITEGVVKD
tr|K9P3X5|K9P3X5_CYAGP|FFSPLRNNFQAALK--EGKVVVCLLIQALIIIEFAISAYHIYIPVADDFARKITEGVVKD
tr|Q0I8M9|Q0I8M9_SYNS3|FFAPLHGNFQVAAA--EGKVVVCLLIQALIIIEFAISAYHIYIPVADDFARKITEGVVKD
tr|G4FIH8|G4FIH8_9SYNE|FFAPLHGNFQVAAA--EGKVVVCLLIQALIIIEFAISAYHIYIPVADDFARKITEGVVKD
tr|Q05RJ5|Q05RJ5_9SYNE|FFAPLHGNFQVAAA--EGKVVVCLLIQALIIIEFAISAYHIYIPVADDFARKITEGVVKD
tr|A5GJG5|A5GJG5_SYNPW|FFGPLHGNFQVAAA--EGKVVVCLLIQALIIIEFAISAYHIYIPVADDFARKITEGVVKD
tr|A4CS34|A4CS34_SYNPV|FFAPLHGNFQVAAA--EGKVVVCLLIQALIIIEFAISAYHIYIPVADDFARKITEGVVKD
tr|A3Z5H6|A3Z5H6_9SYNE|FFAPLHGNFQVAAA--EGKVVVCLLIQALIIIEFAISAYHIYIPVADDFARKITEGVVKD
tr|Q060S1|Q060S1_9SYNE|FFGPLHGNFQVAAA--EGKVVVCLLIQALIIIEFAISAYHIYIPVADDFARKITEGVVKD
tr|Q3AV61|Q3AV61_SYNS9|FFGPLHGNFQVAAA--EGKVVVCLLIQALIIIEFAISAYHIYIPVADDFARKITEGVVKD
tr|Q0QKQ4|Q0QKQ4_9SYNE|FFEPLHGNFQVAAA--EGKVVVCLLIQALIIIEFAISAYHIYIPVADDFARKITEGVVKD
tr|Q0QM11|Q0QM11_9SYNE|FFEPLHGNFQVAAA--EGKVVVCLLIQALIIIEFAISAYHIYIPVADDFARKITEGVVKD
tr|Q3ALN2|Q3ALN2_SYNSC|FFEPLHGNFQVAAA--EGKVVVCLLIQALIIIEFAISAYHIYIPVADDFARKITEGVVKD
tr|W0GVR9|W0GVR9_9SYNE|FFEPLHGNFQVAAA--EGKVVVCLLIQALIIIEFAISAYHIYIPVADDFARKITEGVVKD
tr|Q0QKF3|Q0QKF3_9SYNE|FFEPLHGNFQVAAA--EGKVVVCLLIQALIIIEFAISAYHIYIPVADDFARKITEGVVKD
tr|Q7U5G9|Q7U5G9_SYNPX|FFEPLHGNFQVAAA--EGKVVVCLLIQALIIIEFAISAYHIYIPVADDFARKITEGVVKD
tr|Q0QKK1|Q0QKK1_9SYNE|FFEPLHGNFQVAAA--EGKVVVCLLIQALIIIEFAISAYHIYIPVADDFARKITEGVVKD
tr|A2C0Z0|A2C0Z0_PROM1|FFSKLHNNFLEAFK--VGDVTTCLLIQALIIIEFAISAYHYIRVADDFARKITEGVVQD
tr|Q46GP5|Q46GP5_PROMT|FFSKLHNNFLEAFK--VGDVTTCLLIQALIIIEFAISAYHYIRVADDFARKITEGVVQD
tr|A8G3P7|A8G3P7_PROM2|FFSKLHGNFQVAAA--DGNLTTCLLIQALIIIEFAISAYHYIRVADDFARKITEGVVND
tr|A2BVJ4|A2BVJ4_PROM5|FFSKLHGNFQVAAA--NESLTTCLLIQALIIIEFAISAYHYIRVADDFARKITEGVVND
tr|Q7V2E8|Q7V2E8_PROMP|FFSKLHGNFQVAAA--NGKTTTCLLIQALIIIEFAISAYHYIRVADDFARKITEGVVKD
tr|Q31C02|Q31C02_PROM9|FFSKLHGNFQVAAA--KGNLTTCLLIQALIIIEFAISAYNVYIRVADDFARKITEGVVKD
tr|A2BQ13|A2BQ13_PROMS|FFSKLHGNFQVAAA--KGNLTTCLLIQALIIIEFAISAYNVYIRVADDFARKITEGVVKD
tr|A3PBQ6|A3PBQ6_PROM0|FFSKLHGNFQVAAA--KGNVTTCLLIQALIIIEFAISAYNVYIRVADDFARKITEGVVKD
tr|A9BEF6|A9BEF6_PROM4|FFAPLHGNFQVAAA--NGKITCFLIQALIIIEFAI SAYHYIRVADDFARKITEGVVKD
tr|Q7VD51|Q7VD51_PROMA|FFSPLHGNFQVAAA--EENLTTCFLIQALIIIEFAI SAYHYIRVADDFARKITEGVVKD
tr|B8HLW2|B8HLW2_CYAP4|FFAELHNFQVAAA--AGQVATCLVQVQALIIIECFAIAYNTYIPVADDFARKITEGVVQD
tr|U9VZT6|U9VZT6_9CYAN|FFADLCQAFQTSAT--DRKVATCLLIQSLVIECFAIAYNVYIPVADDFARKITEGVVAD
tr|K9EQR0|K9EQR0_9CYAN|FFADLCQAFQTSAT--DRKVATCLLIQSLIIECFAIAYNVYIPVADDFARKITEGVVAD

```

```

...150.....160.....170.....180.....190.....200....
* * .: : ** : : . : * : * : : * : *
sp|B2J1M1|ALDEC_NOSP7|EYSHLNFGEVWLKEHFAESKAELELANRQNLPIVWKMLNQVEGDAHTMAMEKDALVEDDFM
tr|U5QDK0|U5QDK0_9CYAN|EYTHLNFGEVWLKDFEAVRPGIEQANAQNLPIVWRMLNQEVEDDAATLQMDKEAIVEDFL
tr|Q7NGM3|Q7NGM3_GLOVI|EYTHLNFGEVWLKERFVTVREGIERANAQNLPIVWRMLNAVEADTEVLQMDKEAIVEDDFM
tr|Q2JJ13|Q2JJ13_SYNJB|EYLHLNFGERWLGHEHFGEVKGQIEAANAQNLPLVWQMLQQVDQDVEAIYMDREAIVEDDFM
tr|Q2JX62|Q2JX62_SYNJA|EYLHLNFGERWLGHEHFAEVKAQIEAANAQNLPLVWRQMLQQVEADVEAIYMDREAIVEDDFM
tr|K9RTZ6|K9RTZ6_SYNPK|EYSHLNFGEVWLQENFEAVKAEVETANKDNLPIVWRMLNEVEKDAKVLGMDKDALVEDDFM
tr|Q8DJB4|Q8DJB4_THEEB|EYSHLNFGEIWLKEHFESVKGELEEAANRANLPIVWKMLNQVEADAKVLGMEKDALVEDDFM
tr|V5V382|V5V382_9CHRO|EYSHLNFGEIWLKENFESVKAEELEEAANRANLPIVWKMLNQVEADAKVLGMEKDALVEDDFM
tr|B0C9L0|B0C9L0_ACAM1|EYQHLNNGEEWLKAHFDDVKAIEIQEANRKNLPIVWRMLNEVDKDAAVLGMKEKALVEDDFM
tr|B8HSZ3|B8HSZ3_CYAP4|EYTHLNFGEEWLKANFDSQREEVEAANRENLPIVWRMLNQVETDAHVLMGMEKALVESFM
tr|L8LLH3|L8LLH3_9CHRO|EYTHLNFGEEWLKNFASAKAELEEAANRENLPIVWQMLNEVAEDAAI LAMEKDALVEDDFM
tr|K9Z5G1|K9Z5G1_CYAAP|EYLHLNFGEEWLKANFEASKAELEEAANRQNLPIVWRMLNEVEKDAKTLGMPKEELIEDFM
tr|I4FNH9|I4FNH9_MICAE|EYLHLNFGEEWLKANFETAKKELEEAANRANLPIVWRMLNQVEDDARVLGMEKALVEDDFM
tr|I4I7T6|I4I7T6_9CHRO|EYLHLNFGEEWLKANFETAKKELEEAANRANLPIVWRMLNQVEDDARVLGMEKALVEDDFM
tr|I4HKI6|I4HKI6_MICAE|EYLHLNFGEEWLKANFETAKKELEEAANRANLPIVWRMLNQVENDARVLGMEKALVEDDFM
tr|B0JY93|B0JY93_MICAN|EYLHLNFGEEWLKANFETAKKELEEAANRANLPIVWRMLNQVENDARVLGMEKALVEDDFM
tr|I4GYG9|I4GYG9_MICAE|EYLHLNFGEEWLKANFETAKKELEEAANRANLPIVWRMLNQVEDDARVLGMEKALVEDDFM
tr|I4IM50|I4IM50_MICAE|EYLHLNFGEEWLKANFETAKKELEEAANRANLPIVWRMLNQVEDDARVLAMEKEALVEDDFM
tr|I4FD05|I4FD05_MICAE|EYLHLNFGEEWLKANFETAKKELEEAANRANLPIVWRMLNQVEDDARVLGMEKALVEDDFM
tr|L7E3D3|L7E3D3_MICAE|EYLHLNFGEEWLKANFETAKKELEEAANRANLPIVWRMLNQVEDDARVLAMEKEALVEDDFM
tr|L8NP18|L8NP18_MICAE|EYLHLNFGEEWLKANFETAKKELEEAANRANLPIVWRMLNQVEDDARVLAMEKEALVEDDFM
tr|A8YJD6|A8YJD6_MICAE|EYLHLNFGEEWLKANFETAKKELEEAANRANLPIVWRMLNQVEDDARVLAMEKEALVEDDFM
tr|S3JGS6|S3JGS6_MICAE|EYLHLNFGEEWLKANFETAKKELEEAANRANLPIVWKMLNQVEDDARVLAMEKEALVEDDFM
tr|I4GKL8|I4GKL8_MICAE|EYLHLNFGEEWLKANFETAKKELEEAANRANLPIVWRMLNQVEDDARVLAMEKEALVEDDFM
tr|I4HLI6|I4HLI6_MICAE|EYLHLNFGEEWLKANFETAKKELEEAANRANLPIVWRMLNQVEDDARVLAMEKEALVEDDFM
tr|I4FY74|I4FY74_MICAE|EYLHLNFGEEWLKANFETAKKELEEAANRANLPIVWKMLNQVEDDARVLAMEKEALVEDDFM
tr|I4H417|I4H417_MICAE|EYLHLNFGEEWLKANFETAKDELEEAANRANLPIVWRMLNQVEDDARVLAMEKEALVEDDFM
tr|M1LIQ1|M1LIQ1_9SYNC|EYTHLNYGEEWLKANFATAKKELEQANKENLPLVWKMLNQVQGDAAKVLGMEKALVEDDFM
tr|H0NYN3|H0NYN3_9SYNC|EYTHLNYGEEWLKANFATAKKELEQANKENLPLVWKMLNQVQGDAAKVLGMEKALVEDDFM
tr|H0PB35|H0PB35_9SYNC|EYTHLNYGEEWLKANFATAKKELEQANKENLPLVWKMLNQVQGDAAKVLGMEKALVEDDFM
tr|H0PG18|H0PG18_9SYNC|EYTHLNYGEEWLKANFATAKKELEQANKENLPLVWKMLNQVQGDAAKVLGMEKALVEDDFM
tr|F7US88|F7US88_SYNYG|EYTHLNYGEEWLKANFATAKKELEQANKENLPLVWKMLNQVQGDAAKVLGMEKALVEDDFM
sp|Q55688|ALDEC_SYNY3|EYTHLNYGEEWLKANFATAKKELEQANKENLPLVWKMLNQVQGDAAKVLGMEKALVEDDFM
tr|D3EPA5|D3EPA5_ATETH|EYKHLNFGEVWLGDFENFESSKIELEEAANKTNLPIVWKMLNEVEQDASILGMEKALVEDDFM
tr|B7JUH1|B7JUH1_CYAP8|EYTHLNFGEVWLQEHFEESKAELEEAANKANLPIVWEMLNQVEGDAKVLGMEKALVEDDFM
tr|C7QUV0|C7QUV0_CYAP0|EYTHLNFGEVWLQEHFEESKAELEEAANKANLPIVWEMLNQVEGDAKVLGMEKALVEDDFM
tr|G5J0P0|G5J0P0_CROWT|EYSHLNFGEVWLKENFEASKAELEQANKENLPIVWQMLNEVEDDAEILGMEKALVEDDFM
tr|T2JF13|T2JF13_CROWT|EYSHLNFGEVWLKENFEASKAELEQANKENLPIVWQMLNEVEDDAEILGMEKALVEDDFM
tr|Q4C7T3|Q4C7T3_CROWT|EYSHLNFGEVWLKENFEASKAELEQANKENLPIVWQMLNEVEDDAEILGMEKALVEDDFM
tr|T2IH71|T2IH71_CROWT|EYSHLNFGEVWLKENFEASKAELEQANKENLPIVWQMLNEVEDDAEILGMEKALVEDDFM
tr|A3INE1|A3INE1_9CHRO|EYTHLNFGEIWLKEHFESAKAELEEAANKKNLPIVWQMLNQVEKDAEVLGMEKALVEDDFM
tr|B1WR71|B1WR71_CYAA5|EYTHLNFGEVWLKEHFESAKAELEEDANKENLPLVWQMLNQVEKDAEVLGMEKALVEDDFM
tr|U5DFA3|U5DFA3_9CHRO|EYLHLNFGEVWLREHFDVKEKLERLEANKQNLPIVWQMLNQVEDDAAVLGMKEKEELIEDFM
tr|L8N0G8|L8N0G8_9CYAN|EYLHLNFGEEWLQDHFENSRALEQANRQNLPLVWKMLNQVETDAKVLGMEKALVEDDFM
tr|K9SPY2|K9SPY2_9CYAN|EYLHLNFGEEWLKANFDSAKAELEEAANRQNLPLVWKMLNRVEKDAKVLGMEKALVEDDFM
tr|K9SZC3|K9SZC3_9SYNE|EYLHLNFGEVWLQENFETAKNQLEIANRQNLPLVWKMLNQVAKDAKVLGMEKDALVEDDFM
tr|B4WJ48|B4WJ48_9SYNE|EYMHNLNFGEEWLKANFEASKAELEETANRANLPLIWKMLNQVEEDAAVLGMKEKDALIEDFM
tr|U9WC11|U9WC11_9CYAN|EYMHNLNFGEEWLKANFETAKAELEEAANRQNLPLVWQMLNEVADDAAVLGMKEKALVEDDFM
tr|W5U411|W5U411_9CYAN|EYMHNLNFGEEWLKANFDSAKAELEEAANRQNLPLVWQMLNQVADDAAILGMEKDALVEDDFM
tr|K9F0G4|K9F0G4_9CYAN|EYMHNLNFGEEWLKANFDSAKKELEEAANRQNLPLVWQMLNQVADDAAILGMEKDALVEDDFM
tr|K9ULL9|K9ULL9_9CHRO|EYMHNLNFGEVWLHDFEASKAELEQANRQNLPLVWKMLNNVAKDAKVLGMEKDALVEDDFM
tr|K8GFP8|K8GFP8_9CYAN|EYSHLNFGEEWLKANFEQSKAELEEAANRENLPLVWQMLNQVEEDARVLGMEKDALVEDDFM
tr|D4TEY2|D4TEY2_9NOST|EYTHLNFGEVWLKKEHFEASKAELEEVANRENLPIVWQMLNQVAEDAKVLGMEKDALVEDDFM
tr|D4TRY1|D4TRY1_9NOST|EYTHLNFGEVWLKKEHFEASKAELEEVANRENLPIVWQMLNQVAEDAKVLGMEKDALVEDDFM
tr|K9V615|K9V615_9CYAN|EYMHNLNFGEVWLQANFETAKAELEEAANRQNLPLVWQMLNQVADDAEVLAMEKDALVEDDFM
tr|K9PTP6|K9PTP6_9CYAN|EYSHLKFGEVWLQEHFTEAKAELEEAANRQNLPIVWKMLNQVADDAKILAMEKDALVEDDFM
tr|K7WTY7|K7WTY7_9NOST|EYSHLNFGEVWLQENFTESQAELEEAANRQNLPIVWKMLNEVADDAKVLAMEKDALVEDDFM
tr|K9WRL8|K9WRL8_9NOST|EYSHLNFGEVWLQENFAESKAELEEAANRHNLPIVWKMLNQVADDAQVLAMEKALVEDDFM
tr|K9ZJT3|K9ZJT3_ANACC|EYSHLNFGEVWLQENFAESKAELEETANRQNLPLVWKMLNQVADDAHVLMAMEKEALVEDDFM
tr|D7E2W1|D7E2W1_NOSA0|EYSHLNFGEVWLKEHFAESKAELEEDDANRQNLPIVWQMLNQVADDAARVLAMEKEALVEDDFM
tr|Q112R8|Q112R8_TRIEI|EYSHLNFGEVWLKEYFEDSKQELQKANRQNLPLVWKMLNQVEKDAKTLMEKEALIEDFM
sp|Q54764|ALDEC_SYNE7|EYLHRNFGEEWLKANFDASKAELEEAANRQNLPLVWMLNEVADDAARELGMERESLVEDDFM
tr|Q8KPT4|Q8KPT4_SYNE7|EYLHRNFGEEWLKANFDASKAELEEAANRQNLPLVWMLNEVADDAARELGMERESLVEDDFM
tr|Q5N627|Q5N627_SYNPK|EYLHRNFGEEWLKANFDASKAELEEAANRQNLPLVWMLNEVADDAARELGMERESLVEDDFM
tr|K9RFH5|K9RFH5_9CYAN|EYTHLNFGEVWLKKEHFESKAELEEAANAQNLPIVWKMLNEVE TDAEVMAMPKDALVEDDFM
tr|K9TXF6|K9TXF6_9CYAN|EYTHLNFGEVWLKDNFEQSKAELEEAANRQNLPIVWQMLNKVEDDARVLGMEKDALVEDDFM
tr|K9X9I4|K9X9I4_9CHRO|EYSHLNFGEVWLKEHFESKAELEEAANRQNLPIVWQMLNAVENDAHTLAMEKEALVEDDFM
tr|A0Z9X5|A0Z9X5_NODSP|EYSHLNFGEVWLKENFAESKAELEEAANRQNLPIVWKMLNEVENDAHVLMAMEKEALVEDDFM
tr|Q3MA38|Q3MA38_ANAVT|EYSHLNFGEVWLQKNFAQSKAELEEAANRHNLPIVWKMLNQVADDAAVLAMEKEALVEDDFM

```

```

...150.....160.....170.....180.....190.....200....
* * .: : ** : : . : * : * : : * : *
tr | Q8YLL5 | Q8YLL5_NOSS1 | EYSHLNFGEVWLQKNFAQSKAELEAANRHNLP IVWKMLNQVADDAAVLAMEKEALVEDFM
tr | K9QXA2 | K9QXA2_NOSS7 | EYSHLNFGEVWLKEHFAESKAELEAANRQNLPIVWRMLNQVEADAAILAMEKEALVEDFM
tr | M1X0T0 | M1X0T0_9NOST | EYTHLNFGEVWLKENFEDSKAELEAANRQNLPIVWKMLSSVEEDA AVLAMDKALVEDFM
tr | M1WVU9 | M1WVU9_9NOST | EYTHLNFGEVWLKENFEDSKAELEAANRQNLPIVWKMLSSVEEDA AVLAMDKALVEDFM
tr | K9S7C1 | K9S7C1_9CYAN | EYSHLNFGEVWLKANFEASKAELEAANRQNLPIVWRMLNQVEQDAKT LAMEKDALVEDFM
tr | K9W4T2 | K9W4T2_9CYAN | EYTHLNFGEVWLKEHFEESKAELETANRQNLPIVWQMLNQVAKDAGVLAMEKDALVEDFM
tr | G6FV22 | G6FV22_9CYAN | EYSHLNFGEVWLKEHFEESKAELEAANRQNLPIVWQMLNQVADDAEVLAMEKEALVEDFM
tr | W5U379 | W5U379_9CYAN | EYSHLNFGEVWLKEHFEESKAELEAANRQNLPIVWQMLNQVADDAEVLAMEKEALVEDFM
tr | W5U417 | W5U417_9CYAN | EYSHLNFGEVWLKEHFEESKAELEAANRQNLPIVWQMLNQVADDAEVLAMEKEALVEDFM
tr | K9QA48 | K9QA48_9NOSO | EYSHLNFGEVWLQNF EASKIELEAANRQNLPIVWKMLNQVADDAVLGMEKDALVEDFM
tr | G9HTG5 | G9HTG5_9NOSO | EYSHLNFGEVWLKANFEASKAELEAANRQNLPIVWKMLNQVAADA EVLAMEKEALVEDFM
tr | H2DDT7 | H2DDT7_NOSS6 | EYSHLNFGEVWLKANFEASKAELEAANRQNLPIVWKMLNQVAADA EVLAMEKEALVEDFM
tr | K9YV86 | K9YV86_DACSA | EYTHLNYGEEWLKAHFDEVKDELEVANRQNLPIIWKMLNQVAADAK I LGMEKDALVEDFM
tr | K9Y9U4 | K9Y9U4_HALP7 | EYTHLNYGEEWLKANFDSAKEELEAANRQNLPIVWKMLNQVAADAN VLGMEKDALVEDFM
tr | W5U322 | W5U322_PLAAG | EYMLHLNFGEVWLKANFEASKTELETANRQNLPIIWRMLNQVADDAH I LGMEKDALVEDFM
tr | F5UGX9 | F5UGX9_9CYAN | EYSHLNFGEVWLQAHFEESKAELEAANRQNLPIIWKLLNAVADDA RVLGMEKDALIEDFM
tr | K9VE50 | K9VE50_9CYAN | EYSHLNFGEVWLQAHFEESKAELEAANRQNLPIIWKLLNAVADDA RVLGMEKDALIEDFM
tr | D8FVZ2 | D8FVZ2_9CYAN | EYSHLNFGEVWLQAHFEESKAELEAANRQNLPIVWRMLNQVEDDAR VLGMEKDALVEDFM
tr | B4VSW8 | B4VSW8_9CYAN | EYMLHLNFGEVWLKANFEASKTELEQANKQNLPIVWRMLNQVEKDAH I LGMEKDALVEDFM
tr | K9WII2 | K9WII2_9CYAN | EYMLHLNFGEVWLKDHFEESKAELEQANRQNLPIVWRMLNQVEDDAH I LGMEKDALVEDFM
tr | K9TGS5 | K9TGS5_9CYAN | EYSHLNFGEVWLQAHFAESKTELEQANRQNLPIVWKMLNQVTD DAKVLEMEKEALVEDFM
tr | B5W0S5 | B5W0S5_ARTMA | EYSHLNFGEVWLKAHFEESKAELEAANRQNLPLVWKMLNQVEKDA S I LGMEKEALIEDFM
tr | K1WZT6 | K1WZT6_ARTPT | EYEHHLNFGEVWLKAHFEESKAELEAANRQNLPLVWKMLNQVEKDA S I LGMEKEALIEDFM
tr | W6SNU7 | W6SNU7_9CYAN | EYEHHLNFGEVWLKAHFEESKAELEAANRQNLPLVWKMLNQVEKDA S I LGMEKEALIEDFM
tr | H1WAD2 | H1WAD2_9CYAN | EYEHHLNFGEVWLKAHFEESKAELEAANRQNLPLVWKMLNQVEKDA S I LGMEKEALIEDFM
tr | K6DQI0 | K6DQI0_ARTPT | EYEHHLNFGEVWLKAHFEESKAELEAANRQNLPLVWKMLNQVEKDA S I LGMEKEALIEDFM
tr | D5A1Z8 | D5A1Z8_ARTPN | EYEHHLNFGEVWLKAHFEESKAELEAANRQNLPLVWKMLNQVEKDA S I LGMEKEALIEDFM
tr | U7QM55 | U7QM55_9CYAN | EYMLHLNFGEVWLKAHFEESKAELEAANRQNLPIVWKMLNEVEKDAH I LGMEKDALVEDFM
tr | A0YKK4 | A0YKK4_LYN5P | EYMLHLNFGEVWLKAHFEESKAELEQANSQNLPLVWKMLNEVENDAH I LGMEKDALVEDFM
tr | A3Z6M0 | A3Z6M0_9SYNE | ESEHLDYAEATWLRQHFQVKARVSAVVVEALPTLAMLQSLAADMRV I GMDPEVETLASFS
tr | B5ILL6 | B5ILL6_9CHRO | EYTHLNYGQEWLKANLADVREELQANRENPLVVRKMLEQVAGDAAVL QMDKEDLMADFL
tr | A3YYU8 | A3YYU8_9SYNE | EYTHLNYGQEWLKANLES SRGELQANRVNPLVVRKMLEQVAGDAAVLH MQEDLMADFM
tr | A2C7S0 | A2C7S0_PROM3 | EYTHLNYGQEWLKANLES CREELQANRENPLIRRMLDQVAGDAAVLQ MDKEDLIEDFL
tr | Q7V6D4 | ALDEC_PROMM | EYTHLNYGQEWLKANLES CREELQANRENPLIRRMLDQVAGDAAVLQ MDKEDLIEDFL
tr | A5GUD0 | A5GUD0_SYNR3 | EYTHLNYGQEWLKANFDSRDEIIEANKANLPIIRRMLEEVADDAELK MEKESLIEDFL
tr | K9P3X5 | K9P3X5_CYAGP | EYTHLNYGQEWLKAHLEESRAELQANRDNPLPHVRRMLDRVAADA AVLHMEKEDLIEDFL
tr | Q0I8M9 | Q0I8M9_SYNS3 | EYTHLNYGQEWLKANFEASRDELM EANKVNPLIRSMLEQVAADASV LHMEKEDLIEDFL
tr | G4FIH8 | G4FIH8_9SYNE | EYTHLNYGQEWLKANFEASRDELM EANKVNPLIRSMLEQVAADASV LHMEKEDLIEDFL
tr | Q05RJ5 | Q05RJ5_9SYNE | EYTHLNYGQEWLKANFEASKDELMEANKVNPLIRSMLEEVAKDAAVLH MEKEDLIEDFL
tr | A5GJG5 | A5GJG5_SYNPW | EYTHLNYGQEWLKANFEASREELMEANKVNPLIRSMLEQVAKDAAVL KMEKEDLIEDFL
tr | A4CS34 | A4CS34_SYNPV | EYTHLNYGQEWLKANFDASREELMEANKVNPLIRSMLEQVAEDA AVLKMEKEDLIEDFL
tr | A3Z5H6 | A3Z5H6_9SYNE | EYTHLNYGQEWLKANFEASKDELMEANKANLPLIRSMLEQVAADA AVLQMEKEDLIEDFL
tr | Q060S1 | Q060S1_9SYNE | EYTHLNYGQEWLKANFEASKDEMF AANKANLPLIRSMLEGVAAADA AVLHMEKEDLIEDFL
tr | Q3AV61 | Q3AV61_SYNS9 | EYTHLNYGQEWLKANFEASKDEMF AANKANLPLIRSMLEGVAAADA AVLHMEKEDLIEDFL
tr | Q0QKQ4 | Q0QKQ4_9SYNE | EYTHLNYGQEWLKANFEASKDELFEANKANLPLIRSMLEEDVAADA AVLHMEKEDLIEDFL
tr | Q0QM11 | Q0QM11_9SYNE | EYTHLNYGQEWLKANFEASKDELFEANKANLPLIRSMLEDDVAGDA AVLHMEKEDLIEDFL
tr | Q3ALN2 | Q3ALN2_SYNSC | EYTHLNYGQEWLKANFEASKNDELFEANKANLPLIRSMLEEDVAADA AVLHMEKEDLIEDFL
tr | W0GVR9 | W0GVR9_9SYNE | EYTHLNYGQEWLKANFEASKDELFEANKANLPLIRSMLEEDVAADA AVLHMEKEDLIEDFL
tr | Q0QKF3 | Q0QKF3_9SYNE | EYTHLNYGQEWLKANFEASKDELFEANKANLPLIRSMLEEDVASDA AVLHMEKEDLIEDFL
tr | Q7U5G9 | Q7U5G9_SYNPX | EYTHLNYGQEWLKANFEASKDELFEANKANLPLIRSMLEEVASDA AVLHMEKEDLIEDFL
tr | Q0QKK1 | Q0QKK1_9SYNE | EYTHLNYGQEWLKANFEASKDELFEANKANLPLIRSMLEEVASDA AVLHMEKEDLIEDFL
tr | A2C0Z0 | A2C0Z0_PROM1 | EYLHLNYGQEWLKANLETVKKDLMRANKENLPLIKSMLDEVSNDAE VLHMDKEELMEEFM
tr | Q46GP5 | Q46GP5_PROMT | EYLHLNYGQEWLKANLETVKKDLMRANKENLPLIKSMLDEVSNDAE VLHMDKEELMEEFM
tr | A8G3P7 | A8G3P7_PROM2 | EYLHLNYGQEWLKENLSTCKDEL I AANKVNPLI IKKMLDQVAEDAATLSMDKEELMEEFM
tr | A2BVJ4 | A2BVJ4_PROM5 | EYLHLNYGQEWLKENLSTCKDEL I AANKVNPLI IKKMLDQVADDAATLAMDKEELMEEFM
tr | Q7V2E8 | Q7V2E8_PROMP | EYLHLNYGQEWLKENLSTCKDELMEANKVNPLI IKKMLDQVSEDA SVLAMDREELMEEFM
tr | Q31C02 | Q31C02_PROM9 | EYLHLNYGQEWLKENLSTCKEELMEANKVNPLI IKKMLDEVAEDA SVLAMDREELMEEFM
tr | A2BQ13 | A2BQ13_PROMS | EYLHLNYGQEWLKENLSTCKEELMEANKVNPLI IKKMLDEVAEDA SVLAMDREELMEEFM
tr | A3PBQ6 | A3PBQ6_PROM0 | EYLHLNYGQEWLKENLSTCKDELMEANKVNPLI IKKMLDEVAEDA SVLAMDREELMEEFM
tr | A9BEF6 | A9BEF6_PROM4 | EYLHLNYGQEWLKENLSTCKDEL I AANKENLPLINSMLDQVANDA QVLYMEKEELMEEFM
tr | Q7VD51 | Q7VD51_PROMA | EYLHLNYGQEWLKANLDTCKEELMKANKENLPLIKSMLDQVADDA CSLSMDKEELMEEFM
tr | B8HLW2 | B8HLW2_CYAP4 | EYSHLNFGEVWLQNAFEQCKDEIITANRLALPLIWKMLNQVTGELR I LGMDKASLVEDFS
tr | U9VZT6 | U9VZT6_9CYAN | EYHHLNFGEVWLKAHFETVKALETANRQVPLPIWRMLNQVEADLQTVGMDKQTLIEAFL
tr | K9EQR0 | K9EQR0_9CYAN | EYHHLNFGEVWLKAHFETVKALETANRQVPLPIWQMLNQVDADLQTVGMDKQTLIESFL

```



...210.....220.....230..  
: :\* :\*: : :

|    |        |              |                                  |
|----|--------|--------------|----------------------------------|
| sp | B2J1M1 | ALDEC_NOSP7  | IQYGEALSNIGFSTRDIMRLSAYGLIGA---  |
| tr | U5QDK0 | U5QDK0_9CYAN | IQYGEALSDIGFTTRDVMKMSARGLAAAPRA  |
| tr | Q7NGM3 | Q7NGM3_GLOVI | IAYGEALGDIGFMSRDMKMSARGLASAPRO   |
| tr | Q2JJ13 | Q2JJ13_SYNJB | IAYGEALANIGFSTREVMRLSAQGLRAA---  |
| tr | Q2JX62 | Q2JX62_SYNJA | IAYGEALASIGFNTREVMRLSAQGLRAA---  |
| tr | K9RTZ6 | K9RTZ6_SYNP3 | IQYSGALENIGFTTREIMKMSMHGLVAA---  |
| tr | Q8DJB4 | Q8DJB4_THEEB | IQYSGALENIGFTTREIMKMSVYGLTGA---  |
| tr | V5V382 | V5V382_9CHRO | IQYSGALENIGFTTREIMKMSVYGLTAA---  |
| tr | B0C9L0 | B0C9L0_ACAM1 | IQYGEALSNIGFSTGEIMRMSAYGLVAA---  |
| tr | B8HSZ3 | B8HSZ3_CYAP4 | IQYGEALENIGFSTREIMRMSVYGLSAA---  |
| tr | L8LLH3 | L8LLH3_9CHRO | ISYGEALGNIGFNTRIMRLSSQGLKVA---   |
| tr | K9Z5G1 | K9Z5G1_CYAAP | ISYGEALANIGFSTREIMKMSVYGLRGA---  |
| tr | I4FNH9 | I4FNH9_MICAE | ISYGEALSNIGFSTRDIMRMSAYGLTAV---  |
| tr | I4I7T6 | I4I7T6_9CHRO | ISYGEALSNIGFSTRDIMRMSAYGLTAV---  |
| tr | I4HKI6 | I4HKI6_MICAE | ISYGEALSNIGFSTRDIMRMSAYGLTAV---  |
| tr | B0JY93 | B0JY93_MICAN | ISYGEALSNIGFSTRDIMRMSAYGLTAV---  |
| tr | I4GYG9 | I4GYG9_MICAE | ISYGEALSNIGFSTRDIMRMSAYGLTAV---  |
| tr | I4IM50 | I4IM50_MICAE | ISYGEALSNIGFSTRDIMRMSAYGLTAV---  |
| tr | I4FD05 | I4FD05_MICAE | ISYGEALSNIGFSTRDIMRMSAYGLTAV---  |
| tr | L7E3D3 | L7E3D3_MICAE | ISYGEALSNIGFSTRDIMRMSAYGLTAV---  |
| tr | L8NPI8 | L8NPI8_MICAE | ISYGEALNINIGFSTRDIMRMSAYGLTAV--- |
| tr | A8YJD6 | A8YJD6_MICAE | ISYGEALNINIGFSTRDIMRMSAYGLTAV--- |
| tr | S3JGS6 | S3JGS6_MICAE | ISYGEALSNIGFSTRDIMRMSAYGLTAV---  |
| tr | I4GKL8 | I4GKL8_MICAE | ISYGEALSNIGFSTRDIMRMSAYGLTAV---  |
| tr | I4HLI6 | I4HLI6_MICAE | ISYGEALSNIGFSTRDIMRMSAYGLTAV---  |
| tr | I4FY74 | I4FY74_MICAE | ISYGEALSNIGFSTRDIMRMSAYGLTAV---  |
| tr | I4H417 | I4H417_MICAE | ISYGEALSNIGFSTRDIMRMSAYGLTAV---  |
| tr | M1LIQ1 | M1LIQ1_9SYNC | ISYGEALSNIGFSTREIMRMSVYGLAGV---  |
| tr | H0NYN3 | H0NYN3_9SYNC | ISYGEALSNIGFSTREIMRMSVYGLAGV---  |
| tr | H0PB35 | H0PB35_9SYNC | ISYGEALSNIGFSTREIMRMSVYGLAGV---  |
| tr | H0PG18 | H0PG18_9SYNC | ISYGEALSNIGFSTREIMRMSVYGLAGV---  |
| tr | F7US88 | F7US88_SYNYG | ISYGEALSNIGFSTREIMRMSVYGLAGV---  |
| sp | Q55688 | ALDEC_SYNY3  | ISYGEALSNIGFSTREIMRMSVYGLAGV---  |
| tr | D3EPA5 | D3EPA5_ATETH | ISYGEALGNIGFSTREIMRMSHGLRAS---   |
| tr | B7JUH1 | B7JUH1_CYAP8 | ISYGEALSNIGFSTRDIMRMSHGLVAA---   |
| tr | C7QUV0 | C7QUV0_CYAP0 | ISYGEALSNIGFSTRDIMRMSHGLVAA---   |
| tr | G5J0P0 | G5J0P0_CROWT | ISYGEALGNIGFSTREIMKMSAHGLAAV---  |
| tr | T2JF13 | T2JF13_CROWT | ISYGEALGNIGFSTREIMKMSAHGLAAV---  |
| tr | Q4C7T3 | Q4C7T3_CROWT | ISYGEALGNIGFSTREIMKMSAHGLAAV---  |
| tr | T2IH71 | T2IH71_CROWT | ISYGEALGNIGFSTREIMKMSAHGLAAV---  |
| tr | A3INE1 | A3INE1_9CHRO | ISYGEALSNIGFSTREIMKMSHGLSAA---   |
| tr | B1WR71 | B1WR71_CYAA5 | ISYGEALSNIGFSTREIMKMSAYGLRAA---  |
| tr | U5DFA3 | U5DFA3_9CHRO | VAYSEALSNIGFNAREIARMSVHGLAAA---  |
| tr | L8N0G8 | L8N0G8_9CYAN | IQYGESLGKIGFNTRDIMRMSAMGLVAA---  |
| tr | K9SPY2 | K9SPY2_9CYAN | IAYGEALGNIGFNTRDIMKMSAMGLLPA---  |
| tr | K9SZC3 | K9SZC3_9SYNE | IQYGESLGKIGFNTRDIMKMSAMGLVAA---  |
| tr | B4WJ48 | B4WJ48_9SYNE | ITYGEALANIGFSARDVMRLSAQGLAAV---  |
| tr | U9WCI1 | U9WCI1_9CYAN | ITYGEALSNIGFTSREVMKLSAQGLAMA---  |
| tr | W5U411 | W5U411_9CYAN | ITYGEALGNIGFSSRDVMRLSAQGLATA---  |
| tr | K9F0G4 | K9F0G4_9CYAN | ITYGEALGNIGFSSRDVMRLSAQGLATA---  |
| tr | K9ULL9 | K9ULL9_9CHRO | IAYGEALSNIGFNTRDIMRMSAYGLMGA---  |
| tr | K8GFP8 | K8GFP8_9CYAN | IQYGEALSNIGFTTRDIMRMSAMGLSAA---  |
| tr | D4TEY2 | D4TEY2_9NOST | IQYGEALSNIGFTTRDIMRLSAYGLATI---  |
| tr | D4TRY1 | D4TRY1_9NOST | IQYGEALSNIGFTTRDIMRLSAYGLASI---  |
| tr | K9V615 | K9V615_9CYAN | IQYGEALSNIGFNTRDIMRLSAYGLRAA---  |
| tr | K9PTP6 | K9PTP6_9CYAN | IQYGEALSNIGFTTRDIMRLSAYGLIAA---  |
| tr | K7WTY7 | K7WTY7_9NOST | IQYGEALSNIGFTTRDIMRLSAYGLATV---  |
| tr | K9WRL8 | K9WRL8_9NOST | IQYGEALSNIGFTTRDIMRLSAYGLTAA---  |
| tr | K9ZJT3 | K9ZJT3_ANACC | IQYGEALSNIGFTTRDIMRLSAYGLIPV---  |
| tr | D7E2W1 | D7E2W1_NOSA0 | IQYGEALSNIGFTTRDIRLSAYGLATV---   |
| tr | Q112R8 | Q112R8_TRIEI | IAYGEALNINIGFTTGEIMRMSAYGLIAA--- |
| sp | Q54764 | ALDEC_SYNE7  | IAYGEALENIGFTTREIMRMSAYGLAAV---  |
| tr | Q8KPT4 | Q8KPT4_SYNE7 | IAYGEALENIGFTTREIMRMSAYGLAAV---  |
| tr | Q5N627 | Q5N627_SYNP6 | IAYGEALENIGFTTREIMRMSAYGLAAV---  |
| tr | K9RFH5 | K9RFH5_9CYAN | IQYGEALSNIGFTTRDIMRLSAYGLRAA---  |
| tr | K9TXF6 | K9TXF6_9CYAN | IQYGETLANIGFSTRDIMRLSAYGLQAA---  |
| tr | K9X9I4 | K9X9I4_9CHRO | IQYGEALSNIGFTTRDIMRMSAYGLTAA---  |
| tr | A0Z9X5 | A0Z9X5_NODSP | IQYGETLSNIGFTTRDIMKMSAYGLTAA---  |
| tr | Q3MA38 | Q3MA38_ANAVT | IQYGEALSNIGFTTRDIMRMSAYGLTAA---  |

...210.....220.....230..  
: :\* :\*: : :

|    |        |              |                                   |
|----|--------|--------------|-----------------------------------|
| tr | Q8YLL5 | Q8YLL5_NOSS1 | IQYGEALSNI GFTTRDIMRMSAYGLTAA---  |
| tr | K9QXA2 | K9QXA2_NOSS7 | IQYGEALSNI GFTTRDIMRLSAYGLTAA---  |
| tr | M1X0T0 | M1X0T0_9NOST | IQYGEALNNIGFSTRDIMRLSAYGLRKI---   |
| tr | M1WVU9 | M1WVU9_9NOST | IQYGEALNNIGFSTRDIMRLSAYGLRKV---   |
| tr | K9S7C1 | K9S7C1_9CYAN | IQYGEALDNIGFTTREIMRMSAYGLATI---   |
| tr | K9W4T2 | K9W4T2_9CYAN | IAYGEALSNI GFTTRDIMRMSAYGLTAA---  |
| tr | G6FV22 | G6FV22_9CYAN | IQYGEALSNI GFNTRDIMRLSAYGLRAA---  |
| tr | W5U379 | W5U379_9CYAN | IQYGEALSNI GFNTRDIMRLSAYGLRAA---  |
| tr | W5U417 | W5U417_9CYAN | IQYGEALSNI GFNTRDIMRLSAYGLRTA---  |
| tr | K9QA48 | K9QA48_9NOSO | IQYGEALSKIGFTTRDIMRLSAYGLSAA---   |
| tr | G9HTG5 | G9HTG5_9NOSO | IQYGEALSNI GFSTTRDIMRLSAYGLTAA--- |
| tr | H2DDT7 | H2DDT7_NOSS6 | IQYGEALSNI GFTTRDIMRLSAYGLTAA---  |
| tr | K9YV86 | K9YV86_DACSA | IAYGEALSNI GFSTRDIMRMSAYGLREV---  |
| tr | K9Y9U4 | K9Y9U4_HALP7 | IAYGEALSNI GFNTREIMKMSAYGLREG---  |
| tr | W5U332 | W5U332_PLAAG | IAYGEALSNI GFSTRDIMRMSAYGLIAA---  |
| tr | F5UGX9 | F5UGX9_9CYAN | IAYGEALGNIGFNTRDIMRMSAQGLAA----   |
| tr | K9VE50 | K9VE50_9CYAN | IAYGEALGNIGFNTRDIMRMSAQGLAA----   |
| tr | D8FVZ2 | D8FVZ2_9CYAN | IAYGEALSNI GFTTRDIMRMSAYGLTAA---  |
| tr | B4VSW8 | B4VSW8_9CYAN | IAYGEALSNI GFTTRDIMRMSAYGLTAA---  |
| tr | K9WII2 | K9WII2_9CYAN | IAYGEALSNI GFTTRDIMRMSAYGLTAA---  |
| tr | K9TGS5 | K9TGS5_9CYAN | IAYGEALSTIGFTTRDIMRMSAYGLAGA---   |
| tr | B5W0S5 | B5W0S5_ARTMA | IAYGEALSNI GFTTRDIMRMSAYGLAGV---  |
| tr | K1WZT6 | K1WZT6_ARTPT | IAYGEALSNI GFTTRDIMRMSAYGLAGV---  |
| tr | W6SNU7 | W6SNU7_9CYAN | IAYGEALSNI GFTTRDIMRMSAYGLAGV---  |
| tr | H1WAD2 | H1WAD2_9CYAN | IAYGEALSNI GFTTRDIMRMSAYGLAGV---  |
| tr | K6DQI0 | K6DQI0_ARTPT | IAYGEALSNI GFTTRDIMRMSAYGLAGV---  |
| tr | D5A1Z8 | D5A1Z8_ARTPN | IAYGEALSNI GFTTRDIMRMSAYGLAGV---  |
| tr | U7QM55 | U7QM55_9CYAN | IAYGEALNNMGFTTREIMRMSAYGLKGA---   |
| tr | A0YKK4 | A0YKK4_LYNP  | IAYGEALNNIGFTTREIMRMSAHGLTTA---   |
| tr | A3Z6M0 | A3Z6M0_9SYNE | ELFREALESVGF EAVEARLLMRAAARMV---  |
| tr | B5ILL6 | B5ILL6_9CHRO | SSYQEALMDIGFTGREIAKLAAAALVG---    |
| tr | A3YYU8 | A3YYU8_9SYNE | TSYQEALTDIGFTTREI AKMATAALLG----  |
| tr | A2C7S0 | A2C7S0_PROM3 | IAYQESLTEIGFNTR EITRMAAALVS----   |
| sp | Q7V6D4 | ALDEC_PROMM  | IAYQESLTEIGFNTR EITRMAAALVS----   |
| tr | A5GUD0 | A5GUD0_SYNR3 | IAYQEALMDIGFN SRDLARMSAAALVA----  |
| tr | K9P3X5 | K9P3X5_CYAGP | IAYQDALTDIGFTPREI ARMAAALVG----   |
| tr | Q0I8M9 | Q0I8M9_SYNS3 | IAYQEALNEIGFSSRDIARMAAALS I----   |
| tr | G4FIH8 | G4FIH8_9SYNE | IAYQEALNEIGFSSRDIARMAAALTV----    |
| tr | Q05RJ5 | Q05RJ5_9SYNE | IAYQEALNEIGFSSRDIARMAAALAV----    |
| tr | A5GJG5 | A5GJG5_SYNPW | IAYQEALNEIGFSSRDIARMAAALS I----   |
| tr | A4CS34 | A4CS34_SYNPV | IAYQEALNEIGFSSRDIARMAAALAV----    |
| tr | A3Z5H6 | A3Z5H6_9SYNE | IAYQEALCEIGFSSRDIARMAAALAV----    |
| tr | Q060S1 | Q060S1_9SYNE | IAYQEALNEIGFSSRDIARMAAALAI----    |
| tr | Q3AV61 | Q3AV61_SYNS9 | IAYQEALNEIGFSSRDIARMAAALAI----    |
| tr | Q0QKQ4 | Q0QKQ4_9SYNE | IAYNEALSEIGFSSRDIARMAAALAL----    |
| tr | Q0QM11 | Q0QM11_9SYNE | IAYQEALGEGFTSRDIARMAAALAV----     |
| tr | Q3ALN2 | Q3ALN2_SYNSC | IAYQEALGEGFTSRDIARMAAALAV----     |
| tr | W0GVR9 | W0GVR9_9SYNE | IAYQEALGEGFTSRDIARMAAALAV----     |
| tr | Q0QKF3 | Q0QKF3_9SYNE | IAYQEALGEGFTSRDIARMAAALAV----     |
| tr | Q7U5G9 | Q7U5G9_SYNPX | IAYQEALGEGFTSRDIARMAAALAV----     |
| tr | Q0QKK1 | Q0QKK1_9SYNE | IAYQEALGEGFTSRDIARMAAALAV----     |
| tr | A2C0Z0 | A2C0Z0_PROM1 | IAYQDSLLEIGLDNREI ARMALAAVI-----  |
| tr | Q46GP5 | Q46GP5_PROMT | IAYQDSLLEIGLDNREI ARMALAAVI-----  |
| tr | A8G3P7 | A8G3P7_PROM2 | IAYQDALLEMGLDNREI ARMAMAAIV-----  |
| tr | A2BVJ4 | A2BVJ4_PROM5 | IAYQDALLEMGLDNREI ARMAMAAIV-----  |
| tr | Q7V2E8 | Q7V2E8_PROMP | IAYQDTLLEIGLDNREI ARMAMAAIV-----  |
| tr | Q31C02 | Q31C02_PROM9 | IAYQDTLLEIGLDNREI ARMAMAAIV-----  |
| tr | A2BQ13 | A2BQ13_PROMS | IAYQDTLMEIGLDNREI ARMAMAAIV-----  |
| tr | A3PBQ6 | A3PBQ6_PROM0 | IAYQDTLMEIGLDNREI ARMAMAAIV-----  |
| tr | A9BEF6 | A9BEF6_PROM4 | IAYQDSLMEIGLDAREI ARMALAAIA-----  |
| tr | Q7VD51 | Q7VD51_PROMA | IAYQDSLLEIGLDSREI ARMALAAALV----- |
| tr | B8HLW2 | B8HLW2_CYAP4 | TRYGEALGQIGFKLSEILSLSVQGLQAVTP    |
| tr | U9VZT6 | U9VZT6_9CYAN | VNYSEALKEIGFNTR EILRMASHGLTSSDQR  |
| tr | K9EQR0 | K9EQR0_9CYAN | VHYSEALKEIGFSSREI LRMASHGLASSKQR  |
